# Supplementary material for: Collective Violence against Health Workers in the Context of the COVID-19 Pandemic
Source: Nurs Rep. 2023 Jun 14;13(2):902–12. doi: 10.3390/nursrep13020079 (PMC10303091; doi:10.3390/nursrep13020079)
Supplement: Supplementary file 1 [file nursrep-13-00079-s001.zip › nursrep-2393431-S1 - List of all attack events.xlsx]

## Sheet: Events
event_date	year	actor	region	country	admin1	admin2	admin3	location	latitude	longitude	notes	fatalities	Category	Context	Source
2020-03-01	2020	Opposition group	TBA	China	0	0	0	0	0	0	01 March 2020: In Kowloon Bay, Kwun Tong district, Hong Kong, unidentified black-clad individuals hurled petrol bombs at a general outpatient clinic, one of 18 clinics designated for treating coronavirus patients. No arrests were reported. This was one of many incidents of such designated clinics or quarantine centres across Hong Kong being targeted with petrol bombs following the government’s an…	0	3	1	Health Care at Risk
2020-03-01	2020	Opposition group	TBA	China	0	0	0	0	0	0	01 March 2020: In Kwai Chung, Kwai Tsing district, Hong Kong, four unidentified black-clad men hurled petrol bombs at a general outpatient clinic, which had been designated for treating coronavirus patients. Part of a wall of the clinic was blackened by fire. This was the third time this clinic was targeted using petrol bombs, suspected to be motivated by opposition to the clinic’s designation as…	0	3	1	Health Care at Risk
2020-03-06	2020	Protestors	TBA	Mexico	0	0	0	0	0	0	06 March 2020: In Reynosa city, Tamaulipas state, a nurse working for IMSS Hospital said he came under constant verbal assault from his neighbours. They accused him of carrying the COVID-19 virus and of putting them at risk. His vehicle tires were slashed.	0	3	4	Health Care at Risk
2020-03-13	2020	Protestors	TBA	Sri Lanka	0	0	0	0	0	0	13 March 2020: In Kaluwanchikudy town, Manmunai South and Eruvil Pattu Divisional Secretariat, Batticaloa district, rioters attacked an ambulance in an effort to disrupt the transportation of COVID-19 patients.	0	3	2	Health Care at Risk
2020-03-15	2020	Protestors	TBA	India	0	0	0	0	0	0	15 March 2020: In Dwarka city, Devbhumi Dwarka district, Gujarat state, a doctor who treated COVID-19 patients faced discrimination and harassment by his housing society.	0	3	4	Health Care at Risk
2020-03-16	2020	Patient or their family member	TBA	Afghanistan	0	0	0	0	0	0	16 March 2020: In Herat city and province, 38 patients who had tested positive for COVID-19 at Shaidahe Hospital attacked staff and ran away for fear of being quarantined.	0	2	1	Health Care at Risk
2020-03-16	2020	Patient or their family member	TBA	Chile	0	0	0	0	0	0	16 March 2020: In Santiago city, during a coronavirus test at the German clinic a man and his parents pulled down a doctor’s face mask and coughed into his face. The man also punched the front part of the skull of another doctor.	0	2	1	Health Care at Risk
2020-03-20	2020	Protestors	TBA	UK	0	0	0	0	0	0	Reported 20 March 2020: In the United Kingdom, nurses and medical staff have reported being harassed by members of the public, including being spat at, called 'disease spreaders', and prohibited from buying food.	0	3	3	Health Care at Risk
2020-03-22	2020	Law enforcement	TBA	Venezuela	0	0	0	0	0	0	04 April 2020: In Valera, Trujillo state, police officers arrested one health worker from the University Hospital Dr. Pedro Emilio Carrillo for posting a medical order to perform coronavirus screening tests.	0	2	11	Health Care at Risk
2020-03-24	2020	Protestors	TBA	India	0	0	0	0	0	0	24 March 2020: In India during the midst of the COVID-19 outbreak, landlords forced their tenants, who were doctors, out of their rented properties in the fear that they may have contracted coronavirus at work.	0	3	4	Health Care at Risk
2020-03-25	2020	Rioters (India)	South Asia	India	Maharashtra	Nashik	Malegaon	Malegaon	20.5496	74.5346	On 25 Mar 2020, AIMIM MLA and 3-4 of his supporters reached a hospital in Malegaon town (Nashik, Maharashtra) and assaulted doctors for alleged negligence in treating people suspected of having coronavirus. [size=4-5]	0	1	1	ACLED
2020-03-25	2020	Rioters (Nepal)	South Asia	Nepal	Sudurpashchim	Baitadi		Kuwakot	29.5933	80.7485	On 25 March 2020, locals assaulted a health worker in Purchaudi Municipality's Kuwakot locality (Baitadi district), opposing the decision of the authorities to quarantine their kin following their return from India. The returnees were quarantined as a precautionary measure to minimize the spread of coronavirus. One assaulter was arrested following the incident. [size=at least one]	0	2	11	ACLED
2020-03-25	2020	State military	TBA	Sudan	0	0	0	0	0	0	25 March 2020: In Rapid Support Forces barracks, Khartoum state, Sudanese doctors were assaulted by military forces after the military refused to observe the screening measures setup to control the spread of coronavirus.	0	2	2	Health Care at Risk
2020-03-26	2020	Rioters (India)	South Asia	India	Maharashtra	Mumbai Suburban	Mumbai Suburban	Mumbai	19.0728	72.8826	On 26 Mar 2020, patients and doctors clashed in a ward of St George Hospital in Mumbai City (Mumbai City, Maharashtra), as the doctors refused to treat patients with fever at out-patient-department due to the lack of protective equipment, suspecting that some of the patients may be suffering of coronavirus instead of flu. [size=no report]	0	1	1	ACLED
2020-03-26	2020	Protestors	TBA	Malaysia	0	0	0	0	0	0	26 March 2020: In Malaysia, there were reports that health workers were evicted from their homes by landlords over the fears that tenants could transmit the COVID-19.	0	3	4	Health Care at Risk
2020-03-27	2020	Rioters (Philippines)	Southeast Asia	Philippines	Central Visayas	Cebu	Cebu City	Cebu City	10.3167	123.891	On 27 March 2020, two unidentified assailants harassed a nurse and threw disinfectant (chlorine) at his body while he was walking along Tres de Abril Street in Cebu City, Cebu. The nurse's colleagues at the hospital decried the attack as an example of the discrimination health workers are increasingly facing in the midst of the COVID-19 (coronavirus) pandemic. [size=2]	0	3	3	ACLED
2020-03-27	2020	Rioters (Philippines)	Southeast Asia	Philippines	Soccsksargen	Sultan Kudarat	President Quirino	President Quirino	6.7038	124.737	On 27 March 2020, a group of five suspects harassed a nurse and threw disinfectant (bleach) at his face and body near the public market in President Quirino, Sultan Kudarat, as the nurse was on his way to a hospital to report for duty amid the COVID-19 (coronavirus) pandemic. The hospital decried the attack as an example of the discrimination health workers are increasingly facing in the midst of…	0	3	3	ACLED
2020-03-29	2020	not specified	TBA	Tunisia	0	0	0	0	0	0	29 March 2020: In Pendik district, Istanbul city and province, Marmara region, an unidentified individual stopped an ambulance that was on the way to hospital to question the crew on whether or not the patient onboard was infected with COVID-19. As the crew refused to answer, the perpetrator tried first to punch the crew and subsequently followed the ambulance with his car, forcing it to stop, be…	0	3	2	Health Care at Risk
2020-03-30	2020	Rioters (Israel)	Middle East	Israel	Jerusalem	Jerusalem	Judean Mountains	Jerusalem - Mea Shearim	31.7878	35.2211	On March 30 2020, a number of ultra-orthodox men (Haredi Jewish Group) hurled rocks at a team of health workers in the Mea Shearim neighbourhood of Jerusalem as they were performing coronavirus tests. One paramedic was lightly injured, and the windshield of a Jerusalem municipality vehicle was shattered. [size=no report]	0	2	2	ACLED
2020-03-31	2020	Protestors	TBA	UK	0	0	0	0	0	0	31 March 2020: In Dorset, a nursing home carer was assaulted as she walked home, with her attacker spitting in her face and telling her: ‘You have got corona’. The carer believes she was targeted for wearing her nursing home uniform after a spate of attacks on NHS health workers. The woman was hit on the head and knocked to the ground before being kicked repeatedly and spat on by two teenagers on…	0	3	3	Health Care at Risk
2020-04-01	2020	Patient or their family member	TBA	India	0	0	0	0	0	0	01 April 2020: In Hyderabad city, Deccan region, Telangana state, two patients and family members of another who died of COVID-19 slapped a junior doctor and assaulted a security guard at the Gandhi Hospital, blaming doctors for his death. In response, junior doctors gathered at the entrance of the main building in protest.	0	1	1	Health Care at Risk
2020-04-01	2020	Protestors	TBA	India	0	0	0	0	0	0	01 April 2020: In Tatt Patti Bakhal area, Indore city, Madhya Pradesh state, two female doctors were injured after healthcare workers and civic officials were attacked by a mob while screening residents for coronavirus.	0	2	2	Health Care at Risk
2020-04-01	2020	Rioters (India)	South Asia	India	Karnataka	Bengaluru Urban	Bengaluru North	Bengaluru	12.9719	77.5936	On 1 April 2020, ASHA health workers were attacked by a group of around 100 locals in Bengaluru city (Bengaluru, KN) as they were collecting data about people affected from coronavirus and their travel history. [size=around 100]	0	2	2	ACLED
2020-04-01	2020	Rioters (India)	South Asia	India	Telangana	Hyderabad	Asifnagar	Hyderabad	17.384	78.4563	On 1 April 2020, three relatives of a 49-year-old man who died while undergoing treatment for coronavirus attacked a junior doctor and hospital security staff in Hyderabad city (Hyderabad, TS) blaming them of negligence. The three relatives are also undergoing coronavirus treatment at the hospital. [size=3]	0	1	1	ACLED
2020-04-01	2020	Rioters (India)	South Asia	India	Bihar	Munger	Munger	Munger	25.3745	86.4737	On 1 Apr 2020, a mob of locals pelted stones and clashed with police and doctors in Munger district (Bihar), while they were taken to be quarantined over coronavirus suspicions, alleging lack of basic hygiene and meals at a medical facility. [size=no report]	0	2	2	ACLED
2020-04-01	2020	Rioters (India)	South Asia	India	West Bengal	North 24 Parganas	Barasat-I	Barasat	22.7231	88.4806	On Apr 1 2020, police clashed with locals in the north 24 Parganas district (West Bengal) after residents prevented health workers from collecting coronavirus data. Seven persons were injured when police tried to enforce the lockdown to contain the spread of coronavirus. [size=at least seven]	0	2	2	ACLED
2020-04-02	2020	Protestors	TBA	India	0	0	0	0	0	0	02 April 2020: In Sasthamcotta village, Kunnathoor Tehsil, Kollam district, Kerala state, three people attacked health workers as they attempted to collect information about a birthday party held during the lockdown.	0	2	2	Health Care at Risk
2020-04-02	2020	Rioters (India)	South Asia	India	Madhya Pradesh	Indore	Indore	Indore	22.7179	75.8333	As reported on 2 Apr 2020, locals pelted stones and chased doctors in Indore city (Indore, Madhya Pradesh) during a drive to identify possible coronavirus patients and after an elderly woman, suspected to have come in contact with a coronavirus patient, was asked to accompany the team to a hospital for diagnostic tests. A video of the incident was circulating on social media. Two doctors were inj…	0	2	2	ACLED
2020-04-02	2020	Rioters (India)	South Asia	India	Kerala	Kollam	Kunnathur	Sasthamkotta	9.029	76.6289	On 2 April 2020, three people attacked health workers in Sasthamkotta village (Kollam, KL) as they attempted to collect information about a birthday party during the lockdown enforced by the coronavirus crisis. [size=5]	0	2	2	ACLED
2020-04-02	2020	Protestors	TBA	New Zealand	0	0	0	0	0	0	Reported 02 April 2020: In New Zealand, medical staff are increasingly reporting being spat at by members of the public during the coronavirus lockdown.	0	11	3	Health Care at Risk
2020-04-02	2020	not specified	TBA	Philippines	0	0	0	0	0	0	Reported 02 April 2020: In the Philippines, some nurses have been prevented from leaving their homes by their village captains.	0	3	4	Health Care at Risk
2020-04-03	2020	Protestors	TBA	Mexico	0	0	0	0	0	0	03 April 2020: In San Luis Potosí city and state, a female nurse working at a public hospital was harassed at a convenience shop by children, who threw juice and soda and yelled "Covid!" at her. When the victim scolded the children, she was slapped in the face by their mother. As she attempted to run away, the victim fell and fractured a finger.	0	3	3	Health Care at Risk
2020-04-04	2020	Opposition group	TBA	Afghanistan	0	0	0	0	0	0	April 2020: In Maidan Wardak province, three medics raising awareness about COVID-19 were abducted by the Taliban	0	11	2	Health Care at Risk
2020-04-04	2020	Protestors	TBA	India	0	0	0	0	0	0	04 April 2020: In Kayathar town, Thoothukudi district, Tamil Nadu state, villagers attacked a group of medical workers in a village, while they were picking up family members of a coronavirus patient.	0	2	2	Health Care at Risk
2020-04-04	2020	Protestors	TBA	India	0	0	0	0	0	0	04 April 2020: In Ahmednagar city and district, Maharashtra state, residents assaulted health officials seeking contact details of coronavirus positive patients with the suspicion that they were collecting data for the Citizenship (Amendment) Act, 2019 (CAA) and the National Register of Citizens (NRC).	0	12	2	Health Care at Risk
2020-04-04	2020	Rioters (Israel)	Middle East	Israel	Jerusalem	Jerusalem	Judean Mountains	Jerusalem - Mea Shearim	31.7878	35.2211	On April 4 2020, a group of Haredi men of the Jerusalem faction attacked an ambulance and health workers who were on their way to perform coronavirus tests in the Mea Shearim neighbourhood of Jerusalem. They attacked health workers by rock throwing and at least one rioter used an iron bat. One health worker sustained an injury and needed to be hospitalized, and the ambulance had its windows smash…	0	2	2	ACLED
2020-04-04	2020	Law enforcement	TBA	Sudan	0	0	0	0	0	0	04 April 2020: In Jebel Aulia village, Khartoum state, a male doctor trying to evacuate patients from a hospital building following the discovery of a COVID-19 case was assaulted by one of the patients, who was an armed policeman. The aggressor was joined by four other (apparently unarmed) policemen who continued to beat the doctor, resulting in injuries.	0	11	1	Health Care at Risk
2020-04-05	2020	Protestors	TBA	Australia	0	0	0	0	0	0	05 April 2020: In New South Wales state, an intensive care nurse at Royal North Shore hospital was assaulted after boarding a train while wearing scrubs, due to suspicion of spreading COVID-19. Medical workers are being encouraged not to wear medical outfits in public as a result of increasing hostility.	0	3	3	Health Care at Risk
2020-04-05	2020	Rioters (India)	South Asia	India	Punjab	Ludhiana	Ludhiana East	Ludhiana	30.912	75.8537	On April 5 2020, locals attacked a group of health workers with sticks in Ludhiana (Punjab) allegedly over concerns of them spreading coronavirus. [size=no report]	0	3	3	ACLED
2020-04-05	2020	Rioters (Peru)	South America	Peru	Huancavelica	Huancavelica	Huancavelica	Huancavelica	-12.7826	-74.9727	On 5 April 2020, in Huancavelica city, citizens of the sector staged a demonstration a by throwing rocks against health workers and police forces that were trying to burry a dead man, that was the first dead from coronavirus in the city. They demanded the body to be taken outside the region, because of the fear of being infected from coronavirus. [size=no report]	0	2	2	ACLED
2020-04-07	2020	Protestors	TBA	India	0	0	0	0	0	0	07 April 2020: In Ramganj locality of Ajmer city, Ajmer division, Rajasthan state, locals threatened and pushed a survey medical team over inquiring about people who recently returned home to identify potential cases of coronavirus. 25 people were arrested.	0	2	2	Health Care at Risk
2020-04-08	2020	Paramilitary and vigilante groups	TBA	Mexico	0	0	0	0	0	0	08 April 2020: In Lo de Marcos village, Nayarit state, a female health worker was told by residents that they preferred her not to enter the village. If she did enter, she would not be allowed to leave again.	0	3	4	Health Care at Risk
2020-04-09	2020	Law enforcement	TBA	India	0	0	0	0	0	0	09 April 2020: In Bhopal city and district, Madhya Pradesh state, two junior doctors on their way home from the hospital were beaten with sticks by police officers who accused them of spreading COVID-19.	0	3	3	Health Care at Risk
2020-04-09	2020	Patient or their family member	TBA	Mexico	0	0	0	0	0	0	09 April 2020: In Mexico City, relatives of a COVID-19 patient who recently passed away physically and verbally assaulted doctors and nurses tending to the patient at HGZ #48. They also physically assaulted the police officer at the entrance. The relatives consisted of two ladies and four men, one of whom was apparently armed. They beat two surveillance police officers, demanding to see their fam…	0	1	1	Health Care at Risk
2020-04-10	2020	Rioters (India)	South Asia	India	Haryana	Panchkula	Panchkula	Panchkula	30.6946	76.8504	On April 10 2020, a mob of around 25 men (assumed Hindu) attacked and beat a Muslim nurse in Panchkula (Haryana) and prevented her from entering her village under the suspicion that she will spread coronavirus. [size=around 25]	0	3	3	ACLED
2020-04-11	2020	not specified	TBA	India	0	0	0	0	0	0	11 April 2020: In Jali Kothi area, Meerut city, district and division, Uttar Pradesh state, some unidentified perpetrators attacked a team of medical professionals and other officials, as they arived in the area to take a COVID-19 patient to a hospital for treatment. Police have since arrested four individuals in connection with this incident.	0	11	2	Health Care at Risk
2020-04-11	2020	Protestors	TBA	India	0	0	0	0	0	0	11 April 2020: Budgam district, Jammu and Kashmir administered union territory, rioters attacked a health team and kept them detained during the ongoing lockdown due to the coronavirus. Later, rioters pelted stones at a police team who had gone there to free the trapped health team. Three policemen were injured in the stone pelting.	0	11	2	Health Care at Risk
2020-04-11	2020	Rioters (India)	South Asia	India	Uttar Pradesh	Meerut	Meerut	Meerut	28.98	77.7063	On 11 April 2020, a mob consisting of a Muslim cleric attacked and pelted stones at the police and health workers in Meerut (UP) in their attempt to enforce the lockdown imposed to prevent coronavirus transmissions. 8 booked and 4 injured. [size=at least 8]	0	2	2	ACLED
2020-04-11	2020	Rioters (India)	South Asia	India	Haryana	Panchkula	Panchkula	Ramgarh	30.6487	76.8877	On 11 April 2020, a staff nurse of the Civil Hospital was allegedly assaulted by some youths guarding an entry point (assumed to limit movement due to coronavirus) to Billah village near Ramgarh. [size=no report]	0	11	1	ACLED
2020-04-11	2020	Law enforcement	TBA	Mexico	0	0	0	0	0	0	11 April 2020: In Guadalajara city and municipality, Centro region, Jalisco state, it was reported that some public buses have refused to allow health workers on board. The report claims hospital management have been forced to request their staff to wear civilian clothes to and from work, rather than their scrubs or uniforms.	0	3	3	Health Care at Risk
2020-04-12	2020	Protestors	TBA	India	0	0	0	0	0	0	12 April 2020: In Hindpiri locality of Ranchi city and district, Jharkhand state, about 500 Muslims demonstrated and vandalized ambulances as health teams tried to transfer three coronavirus positive patients to Rajendra Institute of Medical Sciences. No injuries were reported.	0	3	2	Health Care at Risk
2020-04-12	2020	State military	TBA	Myanmar	0	0	0	0	0	0	12 April 2020: In Nar Won village, Mongpan rownship, Shan state, Burmese military troops attacked RCSS (Restoration Council of Shan State) soldiers and healthcare workers that were carrying out routine COVID-19 awareness activities. They have allegedly been trying to prevent the RCSS from providing healthcare since April.	0	12	1	Health Care at Risk
2020-04-13	2020	Rioters (India)	South Asia	India	West Bengal	Paschim Bardhaman	Salanpur	Rupnarayanpur	23.8142	86.8885	On Apr 13 2020, a group of tribal people detained health workers carrying six suspected coronavirus patients in two ambulances to a quarantine centre at Rupnarayanpur in the neighbouring Salanpur block (Paschim Bardhaman district, West Bengal) fearing spread of the virus in the locality. They also ransacked the ambulances, blocked the road and burnt tyres. Though a large police contingent rushed …	0	3	3	ACLED
2020-04-13	2020	Protestors	TBA	Mexico	0	0	0	0	0	0	13 April 2020: In Guadalajara city and municipality, Centro region, Jalisco state, a female ENT specialist had diluted bleach thrown over her while walking in the city in her medical uniform, resulting in injuries.	0	3	2	Health Care at Risk
2020-04-14	2020	Rioters (India)	South Asia	India	Delhi	New Delhi		Delhi - New Delhi	28.6321	77.2244	On 14 April 2020, patients allegedly attacked a female health worker at Lok Nayak Hospital, Delhi, in the coronavirus ward. Reason for attack not reported. [size=no report]	0	11	1	ACLED
2020-04-14	2020	Rioters (India)	South Asia	India	Maharashtra	Palghar	Palghar	Palghar	19.6969	72.7654	On 14 Apr 2020, a doctor from Thane was stoned by tribal villagers in Saarni village of Palghar district (Maharashtra), as they suspected him to be a robber, based on rumors of theft by migrant workers during the coronavirus lockdown. Police rescued him and four officers were injured. [size=no report]	0	12	11	ACLED
2020-04-15	2020	Protestors	TBA	Australia	0	0	0	0	0	0	01 April 2020: In NSW, two teenage boys started coughing at a female nurse while she was travelling on an empty train to work from Macquarie Park. "She's a nurse. She's got COVID-19," they taunted as they coughed. She threatened to call the police and their parents but they kept coughing. Then they said, "We've got COVID-19."	0	3	3	Health Care at Risk
2020-04-15	2020	Protestors	TBA	Australia	0	0	0	0	0	0	April 2020: Across NSW, nurses have been reportedly spat at and criticised online and in public.	0	12	3	Health Care at Risk
2020-04-15	2020	Protestors	TBA	Chile	0	0	0	0	0	0	Reported 15 April 2020: In parts of Chile, drivers have banned nurses from public transportation. In areas where they allow them, other passengers often give them dirty looks and move away, medical groups say.	0	3	3	Health Care at Risk
2020-04-15	2020	Protestors	TBA	India	0	0	0	0	0	0	15 April 2020: In Jagapakad village, Purba Champaran district, Bihar state, villagers attacked police and medical teams over coronavirus screening during the lockdown, injuring nine of them.	0	2	2	Health Care at Risk
2020-04-15	2020	Protestors	TBA	India	0	0	0	0	0	0	15 April 2020: In Ekauni village, Aurangabad district, Bihar state, locals attacked a police officer and health department team who were visiting to get information about migrants during the coronavirus lockdown. Over half a dozen people suffered injuries.	0	2	2	Health Care at Risk
2020-04-15	2020	Protestors	TBA	India	0	0	0	0	0	0	15 April 2020: In Meerut city and district, Uttar Pradesh state, a team of medical professionals trying to take a civilian infected with COVID-19 to hospital for treatment came under attack from residents. A doctor and three paramedics were hurt and an ambulance was damaged in the stone-pelting.	0	2	2	Health Care at Risk
2020-04-15	2020	Rioters (India)	South Asia	India	Uttar Pradesh	Moradabad	Moradabad	Moradabad	28.8389	78.7768	On 15 April 2020, a mob of around 100 people attacked doctors and health workers in Moradabad (UP) who had come to take family members of a coronavirus patient to quarantine. 7 people, including 4 health workers and 3 policemen injured. 17 arrested. [size=around 100]	0	2	2	ACLED
2020-04-15	2020	Rioters (Mexico)	North America	Mexico	Sinaloa	Culiacan		Culiacan Rosales	24.8088	-107.394	On 15 April 2020, in Culiacan, Sinaloa, a group of people attacked the house of a health worker throwing bricks and stones at the house in fraccionamiento Valle Alto. Health workers have been victims of attacks by people who considered that they are infected with coronavirus. [size=no report]	0	3	4	ACLED
2020-04-15	2020	Rioters (Mexico)	North America	Mexico	Jalisco	Zapopan		Zapopan	20.7206	-103.388	On 15 April 2020, in Zapopan, Jalisco, a group of people attacked a female doctor throwing chlorine at her blaming that she could infect them with coronavirus. In the midst of the coronavirus pandemic, aggressions and discrimination against employees in the health sector are increasing. [size=no report]	0	3	3	ACLED
2020-04-15	2020	Law enforcement	TBA	Sudan	0	0	0	0	0	0	15 April 2020: In Jebel Aulia village, Khartoum state, police severely beat a doctor at the hospital, after doctors requested the hospital be evacuated due to a suspected outbreak of coronavirus. Doctors subsequently went on strike.	0	2	1	Health Care at Risk
2020-04-15	2020	Protestors	TBA	Sudan	0	0	0	0	0	0	15 April 2020: In Omdurman city, Khartoum state, locals rioted and tried to attack a hospital following rumours that it would take COVID-19 patients. Several people were arrested.	0	3	1	Health Care at Risk
2020-04-16	2020	Protestors	TBA	India	0	0	0	0	0	0	16 April 2020: In Areraj village, Purba Champaran district, Bihar state, locals attacked a medical and police team who went there to spread awareness about coronavirus and urge villagers to follow lockdown and social distancing guidelines. Three security personnel and a health manager were injured.	0	2	2	Health Care at Risk
2020-04-16	2020	Rioters (India)	South Asia	India	Maharashtra	Solapur	Solapur North	Solapur	17.6715	75.9104	On 16 Apr 2020, youths set on fire a nurse's vehicle in Solapur town (Solapur, Maharashtra) after arguments during which the nurse was trying to convince them to stay home during the coronavirus lockdown. 3 of them were arrested the following day. [size=at least 3]	0	12	4	ACLED
2020-04-17	2020	Rioters (India)	South Asia	India	Uttar Pradesh	Bareilly	Bareilly	Bareilly	28.347	79.4219	On 17 April 2020, a mob of 4-5 families assaulted a team of Auxiliary Nurse Midwife (ANM), tempered their records in Unchey Faridpur area, Bareilly (UP) as they were enquiring about coronavirus cases. [size=no report]	0	2	2	ACLED
2020-04-17	2020	Rioters (India)	South Asia	India	Bihar	Darbhanga	Darbhanga	Bhal Patti	26.1853	86.0499	On 17 Apr 2020, a family assaulted a health worker and a police officer in Bhal Patti village (Darbhanga, Bihar), who were screening people during the coronavirus epidemic and tore their register. [size=no report]	0	2	2	ACLED
2020-04-17	2020	Protestors	TBA	Mexico	0	0	0	0	0	0	17 April 2020: In Iztapalapa municipality, Mexico City, an ambulance carrying a possible coronavirus carrier was attacked by a group of people.	0	3	2	Health Care at Risk
2020-04-17	2020	Protestors	TBA	Mexico	0	0	0	0	0	0	17 April 2020: In San Luis Potosi city, San Luis Potosi state, allegedly after assaulting another woman, two people beat up a woman once they realized she was a nurse, accusing her of spreading the coronavirus.	0	3	3	Health Care at Risk
2020-04-18	2020	Rioters (India)	South Asia	India	Uttar Pradesh	Meerut	Meerut	Meerut	28.98	77.7063	On 18 April 2020, a mob of local residents attacked a government doctor, in Meerut (UP), who lived in their neighbourhood asking him to vacate over fears of him spreading coronavirus. [size=no report]	0	3	4	ACLED
2020-04-19	2020	Rioters (India)	South Asia	India	Karnataka	Bengaluru Urban	Bengaluru North	Bengaluru	12.9719	77.5936	On 19 April 2020, locals held a demonstration in Bengaluru city (Bengaluru, KN) as health workers attempted to take 58 secondary contacts of a coronavirus positive patient to quarantine centres. Rioters attacked health workers and the policemen and destroyed pandals. Next day at least 54 people were arrested over the incident. [size=at least 54]	0	2	2	ACLED
2020-04-19	2020	Rioters (India)	South Asia	India	Maharashtra	Nashik	Malegaon	Malegaon	20.5496	74.5346	On 19 Apr 2020, relatives of a patient who died of coronavirus vandalized medical equipment and assaulted health workers at a quarantine ward in a hospital in Malegaon town (Nashik, Maharashtra), angry about the death of their relative. [size=no report]	0	1	1	ACLED
2020-04-20	2020	Rioters (India)	South Asia	India	Tamil Nadu	Chennai	Chennai	Chennai	13.0878	80.2784	On 20 April 2020, at least close to 50 local residents held a demonstration against the burial of a coronavirus positive doctor in Chennai city (Chennai, TN). Rioters attacked hospital staffs including doctors and the ambulance. [size=at least close to 50]	0	3	11	ACLED
2020-04-21	2020	Protestors	TBA	India	0	0	0	0	0	0	21 April 2020: In Faridabad city and district, Haryana state, a mob attacked an Accredited Social Health Activist (ASHA) worker while she was conducting door to door surveillance and collecting information about coronavirus cases. Five policemen who intervened were also attacked. Three people, including two policemen and the ASHA worker, were injured. Five people were arrested.	0	2	2	Health Care at Risk
2020-04-22	2020	Patient or their family member	TBA	India	0	0	0	0	0	0	22 Apr 2020: In Sheopur city and district, Madhya Pradesh state, members of a family attacked a team of police and physicians as they requested to test a member of their family who had returned from Guna for coronavirus. One officer sustained a head injury.	0	2	2	Health Care at Risk
2020-04-22	2020	Rioters (India)	South Asia	India	Odisha	Jajapur	Jajapur	Jajpur	20.8485	86.3372	On 22 Apr 2020, few people who had returned from Bengal attacked an ASHA health worker, a government worker, and a local sarpanch in Jajpur district (Odisha), as they advised them to stay in a coronavirus quarantine facility. [size=few]	0	2	1	ACLED
2020-04-22	2020	Rioters (India)	South Asia	India	Haryana	Panchkula	Kalka	Pinjore	30.7987	76.9182	On 22 April 2020, a mob of 15 people attacked a doctor working in the coronavirus ward of a local hospital in Pinjore town, Panchkula (Haryana). Reason for the attack not reported, but assumed to be due to the fear of the doctor spreading coronavirus in the area. [size=15]	0	3	3	ACLED
2020-04-22	2020	State military	TBA	Nigeria	0	0	0	0	0	0	22 April 2020: In Ode-Irele town, Irele Local Government Area, Ondo state, Nigerian Armed Forces injured a nurse at a coronavirus checkpoint.	0	11	1	Health Care at Risk
2020-04-23	2020	Rioters (India)	South Asia	India	Odisha	Baleshwar	Baleshwar	Balasore	21.4871	86.9246	On 23 Apr 2020, a family assaulted an ASHA health worker and his family at their home in Balasore town (Balasore, Odisha) in disagreement over collecting details on coronavirus cases in the Niliabag containment zone. [size=no report]	0	2	4	ACLED
2020-04-23	2020	Protestors	TBA	Mexico	0	0	0	0	0	0	23 April 2020: In Santiago de Queretaro city, Queretaro state, a female health worker was beaten by two women who accused the worker of being infected with the coronavirus. The state police arrested the perpetrators.	0	3	3	Health Care at Risk
2020-04-25	2020	Protestors	TBA	India	0	0	0	0	0	0	25 April 2020: In Hyderabad city, Deccan region, Telangana state, a doctor treating coronavirus patients was harassed and abused by residents at the building where her brother lives. She was denied entry.	0	3	4	Health Care at Risk
2020-04-25	2020	State military	TBA	Myanmar	0	0	0	0	0	0	25 April 2020: In Doothahtoo, Thaton district, the Myanmar military threatened Karen National Union (KNU) health workers at four Covid-19 screening sites, forcing them to shut down.	0	12	1	Health Care at Risk
2020-04-27	2020	Rioters (Bolivia)	South America	Bolivia	La Paz	Sud Yungas	La Asunta	La Asunta	-16.1264	-67.1957	Around 27 April 2020, in La Asunta, La Paz, citizens attacked health workers who were assigned to disinfect cars. Locals thought the workers were seizing coca products. The event happened during the lockdown measures implemented to stop coronavirus from spreading. [size=no report]	0	12	2	ACLED
2020-04-27	2020	Rioters (India)	South Asia	India	Haryana	Ambala	Ambala	Chand Pura	30.3498	76.895	On 27 April 2020, a mob of at least 30 people attacked health workers and the police in Chandpura village near Ambala (Haryana), against the cremation of a coronavirus casualty, fearing the spread of the virus in their village. [size=at least 30]	0	3	2	ACLED
2020-04-28	2020	Protestors	TBA	India	0	0	0	0	0	0	28 April 2020: In Kurnool city, Andhra Pradesh state, locals demonstrated and pelted stones at civic officials and ambulances in opposition to the cremation of a coronavirus positive patient. Police resorted to lathi charge to disperse rioters.	0	3	2	Health Care at Risk
2020-04-28	2020	Rioters (India)	South Asia	India	Uttarakhand	Haridwar	Roorkee	Bhagwanpur	29.9408	77.8139	On 28 April 2020, a mob of villagers snatched registers of health workers collecting information on coronavirus and attacked them, in Makhanpur village, Bhagwanpur (Haridwar, Uttarakhand) fearing that they are collecting information about the Citizenship (Amendment) Act, 2019 (CAA) and National Register of Citizens (NRC). 2 arrested. [size=no report]	0	2	2	ACLED
2020-04-29	2020	Protestors	TBA	India	0	0	0	0	0	0	20 April 2020: In Chennai city, Tamil Nadu state, a mob of around 60 people pelted stones at health workers seeking to bury a neurosurgeon who died of COVID-19. As a result, ambulance drivers were badly injured, while the ambulance was damaged.	0	3	2	Health Care at Risk
2020-04-29	2020	Rioters (India)	South Asia	India	Uttar Pradesh	Kanpur Nagar	Kanpur	Kanpur	26.4652	80.3497	On 29 April 2020, a mob attacked health workers and police in Kanpur (UP) as they went to quarantine a family due to coronavirus in the area. 10 arrested. [size=at least 10]	0	2	2	ACLED
2020-04-30	2020	Rioters (Bolivia)	South America	Bolivia	La Paz	Murillo	El Alto	El Alto	-16.4955	-68.1934	On 30 April 2020, in El Alto, La Paz, a group of citizens staged a demonstration and blocked the Puente Vela sector to demand immediate national elections. They threw rocks to buses transporting health workers and destroyed military equipment. The police arrested some demonstrators, for violating quarantine orders. This happened during the lockdown measures were implemented to stop coronavirus fr…	0	12	11	ACLED
2020-05-01	2020	Rioters (Georgia)	Caucasus and Central Asia	Georgia	Kvemo Kartli	Bolnisi		Mushevani	41.4151	44.4621	On 1 May 2020, an angry mob attacked doctors who were trying to transport coronavirus patients from village Mushevani in Bolnisi, Lower Kartli, to hospital. The rioters threw stones and sticks at the emergency cars. They claimed that there was no virus in the village. The police arrived at the scene and had a verbal dispute with the rioters. No injuries were reported. [size=no report]	0	2	2	ACLED
2020-05-02	2020	Law enforcement	TBA	Mexico	0	0	0	0	0	0	01 May 2020: In Colonia Campestre, Nezahualcoyolt city, Mexico state, a doctor who had been treating patients with COVID-19 symptoms at his residence, was detained and beaten by police officers. According to the police, members of the community had beaten him claiming he was not a real doctor.	0	11	4	Health Care at Risk
2020-05-02	2020	Opposition group	TBA	Yemen	0	0	0	0	0	0	02 May 2020: In Sira island, Crater district, Aden governorate, dozens of unidentified armed men over two military vehicles reportedly stormed the Health office, confiscating 12 disinfection sprinkler devices due to the coronavirus spreading in Yemen.	0	12	1	Health Care at Risk
2020-05-05	2020	Paramilitary and vigilante groups	TBA	India	0	0	0	0	0	0	05 May 2020: In Santipur Tehsil, Nadia district, West Bengal, a mob beat up an ambulance driver when he was returning home, with rods and sticks at Barojiakur village causing severe injuries. The driver was engaged in ferrying coronavirus patients. The mob feared that the driver would bring coronavirus in their village. The mob also assaulted his parents when they tried to save him.	0	3	4	Health Care at Risk
2020-05-05	2020	Rioters (India)	South Asia	India	Gujarat	Anand	Anand	Anand	22.5525	72.9552	On 5 May 2020, residents pelted stones at police and health workers in Vallabh Vidyanagar locality of Anand city (Anand, Gujarat), opposing the cremation of a deceased coronavirus patient at a crematorium. Two police personnel and an ambulance driver were injured and 71 people were arrested. [size=at least 71]	0	3	2	ACLED
2020-05-07	2020	Rioters (India)	South Asia	India	Haryana	Palwal	Palwal	Palwal	28.1446	77.3254	On 7 May 2020, a group of 7-9 men stabbed a male nurse and attacked 2 security guards, in Palwal (Haryana) after he demanded that they maintain social distancing in the hospital, due to coronavirus. [size=7-9]	0	2	1	ACLED
2020-05-07	2020	More than one perpetrator	TBA	Senegal	0	0	0	0	0	0	07 May 2020: In Thor village, Thies subdivision, Keur Moussa arrondissement, Thies region, villagers demonstrated against the decision of authorities to quarantine 20 suspected coronavirus cases. They threw stones at the local response centre and clashed with the military forces who intervened to disperse them.	0	2	1	Health Care at Risk
2020-05-08	2020	Rioters (Guatemala)	Central America	Guatemala	Totonicapan	Totonicapan		Totonicapan	14.9117	-91.3611	On 8 May 2020, in Totonicapan, Totonicapan, in Chipuac village, residents attacked health workers by throwing stones at them to prevent them from checking the community to diagnose coronavirus cases. [size=no report]	0	2	2	ACLED
2020-05-11	2020	Rioters (India)	South Asia	India	Maharashtra	Aurangabad	Aurangabad	Aurangabad	19.8775	75.3422	On 11 May 2020, neighbors pelted stones at the house of a nurse, while she was inside, in Aurangabad city (Aurangabad, Maharashtra) wanting her to leave the locality in fear that she would spread the coronavirus. [size=no report]	0	3	4	ACLED
2020-05-11	2020	Rioters (Sierra Leone)	Western Africa	Sierra Leone	Northern	Tonkolili	Kholifa Rowalla	Magburaka	8.7167	-11.95	On 11 May 2020, a group of youths attacked and stabbed an ambulance driver in Mathoir village in the Magburaka area (Tonkolili, Northern). They accused health workers of attempting to spread coronavirus. [size=no report]	0	3	11	ACLED
2020-05-12	2020	Rioters (Bolivia)	South America	Bolivia	Cochabamba	Cercado	Cochabamba	Cochabamba	-17.3895	-66.1568	On 12 May 2020, in Cochabamba city, a group of MAS movement followers blocked the access to the K'ara K'ara city dump for the second day, to demand lifting of quarantine measures, the resignation of the president Jeanine Anez, new general elections and other demands. The event happened during the lockdown implemented to stop coronavirus from spreading. Journalists and health workers were attacked…	0	2	11	ACLED
2020-05-12	2020	Law enforcement	TBA	Mexico	0	0	0	0	0	0	12 May 2020: In Ecatepec de Morelos, a female nurse was hit and injured by police officers after she demanded them to respect COVID-19 social distancing. They also attempted to arrest her.	0	2	11	Health Care at Risk
2020-05-14	2020	Rioters (India)	South Asia	India	Bihar	Araria	Araria	Araria	26.1307	87.4468	On 14 May 2020, migrant laborers at a coronavirus quarantine center attacked a local mukhiya (village body head) and held a nurse hostage in Araria district (Bihar), angry about the living conditions at the center. [size=no report]	0	12	1	ACLED
2020-05-14	2020	Patient or their family member	TBA	Mexico	0	0	0	0	0	0	14 May 2020: In Xilitla town, San Luis Potosi state, health personnel in charge of searching for contacts of people infected by coronavirus were beaten by a family who accused them of being infected. There were no injuries reported.	0	3	2	Health Care at Risk
2020-05-14	2020	Patient or their family member	TBA	Mexico	0	0	0	0	0	0	14 May 2020: In Tamazunchale town, San Luis Potosi state, health personnel in charge of searching for contacts of people infected by coronavirus were beaten by a family who accused them of being infected. There were no injuries reported.	0	3	2	Health Care at Risk
2020-05-14	2020	Protestors	TBA	Pakistan	0	0	0	0	0	0	14 May 2020: In Karachi city, Sindh Province, a mob attacked a ward at Jinnah Postgraduate Medical Centre (JPMC), as the management did not allow a family to take the body of a deceased coronavirus patient without permission of the administration. The mob managed to take the body outside; but the body brought back in after Rangers arrived at the hospital.	0	2	1	Health Care at Risk
2020-05-15	2020	Rioters (Malawi)	Eastern Africa	Malawi	Southern	Blantyre City	Blantyre City	Ndirande	-15.7697	35.0416	Around 15 May 2020 (month of), a group attacked health workers in Ndirande (Blantyre, Southern) as they buried a coronavirus victim at the Malabada Cemetery. No reports on injures. [size=no report]	0	11	2	ACLED
2020-05-15	2020	Protestors	TBA	Mexico	0	0	0	0	0	0	15 May 2020: In Tlapa city, Guerrero state, a Red Cross paramedic named Alberto Montiel Flores was attacked by two men under the "Rio Jale" bridge. They beat him, made him kneel on the ground, threw chlorine/bleach on him, and told him not to spread the coronavirus in Tlapa anymore. Earlier in the day, the victim was seen distributing masks to people in the town.	0	3	3	Health Care at Risk
2020-05-16	2020	Protestors	TBA	Bolivia	0	0	0	0	0	0	16 May 2020: In Villa Yapacani municipality, Santa Cruz department, a group of citizens staged a demonstration in the 5th kilometer in the highway towards Cochabamba to demand that the government fulfil their 12 claims. The group threw rocks at an ambulance entering the sector. This happened during the lockdown measures implemented to stop coronavirus from spreading.	0	11	2	Health Care at Risk
2020-05-16	2020	Protestors	TBA	Brazil	0	0	0	0	0	0	16 May 2020: In Mossoro city, Rio Grande do Norte state, researchers trying to collect data for a coronavirus research were beaten up by locals. In other cities, there have been reports of researchers being arrested or having their samples seized or destroyed.	0	2	2	Health Care at Risk
2020-05-17	2020	Rioters (India)	South Asia	India	Gujarat	Surat	Surat City	Surat	21.1959	72.8302	Around 17 May 2020 (as reported), four people assaulted a nurse in Lambayat area of Surat city (Surat, Gujarat), preventing her from going to a private hospital where she worked in fear that she would spread coronavirus. The four people resided in the same housing society as the nurse. [size=four]	0	3	4	ACLED
2020-05-17	2020	Rioters (Mexico)	North America	Mexico	Hidalgo	Tula de Allende		Tula de Allende	20.0552	-99.3432	On 17 May 2020, in Tula de Allende, Hidalgo, a group of relatives of a patient infected with coronavirus attacked a group of health workers inside the General Hospital of Tula. The people beat the doctors accusing them of being killers. [size=no report]	0	1	1	ACLED
2020-05-18	2020	Patient or their family member	TBA	Kyrgyzstan	0	0	0	0	0	0	18 May 2020: In Dacha-Suu Hamlet, Sokuluk District, Chui Region, dozens of quarantined rioters (who previously arrived from Russia) attacked medics and attempted to vandalize an ambulance vehicle at a coronavirus observation facility close to the Manas airport. The incident took place after unconfirmed rumors spread in the camp that some infected patients have been dicharged and allowed to contin…	0	12	1	Health Care at Risk
2020-05-18	2020	Protestors	TBA	Mexico	0	0	0	0	0	0	18 May 2020: In Guadalajara city and municipality, Centro region, Jalisco state, a male sanitary worker at Guadalajara hospital was beaten up by fellow bus passengers, resulting in injuries.	0	12	3	Health Care at Risk
2020-05-18	2020	Rioters (Mexico)	North America	Mexico	Campeche	Calkini		Nunkini	20.4002	-90.148	On 18 May 2020, in Nunkini, Campeche, a group of residents of the village attacked a group of health workers who were sent to carry out a sanitation action to prevent the spread of the coronavirus. The participants used stones and sticks to attack the workers. The villagers do not trust the doctors because they do not believe that the pandemic is real. [size=no report]	0	2	2	ACLED
2020-05-18	2020	Rioters (Mexico)	North America	Mexico	Oaxaca	Santa Maria Jacatepec		Santa Maria Jacatepec	17.86	-96.2114	On 18 May 2020, in Santa Maria Jacatepec municipality, Oaxaca, a group of residents of La Joya community detained nine health workers who were sent to the community to treat a patient infected with coronavirus. [size=no report]	0	11	2	ACLED
2020-05-19	2020	Rioters (Bangladesh)	South Asia	Bangladesh	Dhaka	Narayanganj	Narayanganj Sadar	Fatullah	23.6383	90.48	On 19 May 2020, workers of a garment factory staged a demonstration on factory premises in Kayempur locality of Fatullah town (Narayanganj, Dhaka) demanding arrears amid the coronavirus lockdown. The demonstrators attacked the vehicle of a doctor who came to check suspected coronavirus patients at the factory. [size=no report]	0	2	2	ACLED
2020-05-20	2020	Rioters (Bolivia)	South America	Bolivia	La Paz	Murillo	Nuestra Senora de La Paz	La Paz	-16.4957	-68.1336	On 20 May 2020, in La Paz city, a group of citizens threw rocks to a bus that was transporting health workers in Peripherical avenue. The bus was damaged, no injured were reported. This happened during the lockdown measures implemented to stop coronavirus from spreading. [size=no report]	0	11	11	ACLED
2020-05-20	2020	Protestors	TBA	DRC	0	0	0	0	0	0	Reported 20 May 2020: In the Kimbanseke commune, Tshangu district, Kinshasa city, three health workers working in a response team against the coronavirus pandemic were kidnapped by a local family. No more details were reported, but authorities stated that assaults against these health workers have multiplied in this city due to increasing public resistance to the restrictions.	0	2	2	Health Care at Risk
2020-05-20	2020	Patient or their family member	TBA	Mexico	0	0	0	0	0	0	20 May 2020: In Toluca de Lerdo city, Mexico State, relatives of a patient who died after being infected with coronavirus attacked a group of paramedics accusing them of causing the death. The people beat the workers and caused damages to an ambulance.	0	3	2	Health Care at Risk
2020-05-20	2020	Rioters (Pakistan)	South Asia	Pakistan	Punjab	Lahore		Lahore	31.5497	74.3436	On 20 May 2020, a group around 30 men surrounded a security guard and slapped him at Mayo hospital coronavirus ward in Lahore city (Lahore, Punjab). They broke a door and scuffled with doctors after one of their relatives diagnosed with the virus died while being transported to the hospital. [size=around 30]	0	1	1	ACLED
2020-05-21	2020	Rioters (India)	South Asia	India	Karnataka	Bagalkote	Mudhol	Mudhol	16.3335	75.283	On 21 May 2020, an ASHA health worker was attacked in Mudhol town (Bagalkot, KN) while on coronavirus related duty to verify travel details of people. An FIR has been registered against two persons, while one person has been arrested over the incident. [size=no report]	0	2	2	ACLED
2020-05-24	2020	Rioters (India)	South Asia	India	Maharashtra	Mumbai Suburban	Mumbai Suburban	Andheri East	19.1155	72.872	On 24 May 2020, three persons beat up a nurse in Andheri east locality (Mumbai suburban, Maharashtra) after the nurse objected to her two and half year old nephew being barred from entering the house of a neighbour over fears that he would spread coronavirus, as his aunt, the nurse, was working in a hospital with coronavirus cases. The nurse suffered head injuries and shared a video of the assaul…	0	3	4	ACLED
2020-05-25	2020	Protestors	TBA	Honduras	0	0	0	0	0	0	25 May 2020: In an unspecified location in Honduras, a nurse was reportedly assaulted with stones on her way back from work and yelled at for being a source for infection.	0	3	3	Health Care at Risk
2020-05-27	2020	Rioters (India)	South Asia	India	Uttar Pradesh	Bhadohi	Bhadohi	Bhadohi	25.3952	82.5703	On 27 May 2020, a mob of villagers attacked health workers near Rampur village in Bhadohi (UP) against the cremation of a coronavirus patient in the area. 9 arrested. [size=at least 9]	0	3	2	ACLED
2020-05-27	2020	Protestors	TBA	Mexico	0	0	0	0	0	0	27 May 2020: In San Antonio de la Cal town and municipality, Oaxaca state, a group of people rejected the presence of sanitation workers, attacking and detaining at least 15 them for a few hours. The participants accused the workers of spreading coronavirus, damaged the vehicles of the workers, and set fire to the offices of the city hall.	0	3	2	Health Care at Risk
2020-05-27	2020	Rioters (Mexico)	North America	Mexico	Yucatan	Merida		Merida	20.9672	-89.6244	On 27 May 2020, in Merida, Yucatan, a group of people set on fire the vehicle and house of a nurse fearing that she could be infected with coronavirus. [size=no report]	0	3	4	ACLED
2020-05-27	2020	Patient or their family member	TBA	UK	0	0	0	0	0	0	27 May 2020 (DOA): In Wales, reports emerged that a small number of paramedics have been assaulted after asking patients to wear masks to protect themselves from COVID-19.	0	2	2	Health Care at Risk
2020-05-28	2020	Patient or their family member	TBA	Colombia	0	0	0	0	0	0	28 May 2020: In Barranquilla city and district, Atlantico department, a group of relatives of a patient attacked the infrastructure of the medical center where the patient died due to coronavirus. Two members of the Adelita de Char health center were injured.	0	1	1	Health Care at Risk
2020-05-28	2020	Protestors	TBA	India	0	0	0	0	0	0	28 May 2020: In Mumbai city, Maharashtra state, 82 Bhatia hospital nurses barred from entering their homes by their neighbours for fear of being infected were housed by the hospital.	0	3	4	Health Care at Risk
2020-05-28	2020	Protestors	TBA	Senegal	0	0	0	0	0	0	28 May 2020: In the Diamaguene-Sicap Mbao neighborhood, Dakar city, department and region, residents threw stones at aid volunteers to prevent them from burying one person deceased of the coronavirus in the local cemetery. Three volunteers were injured.	0	3	2	Health Care at Risk
2020-05-29	2020	Patient or their family member	TBA	Pakistan	0	0	0	0	0	0	29 May 2020: In Peshawar city and district, Khyber Pakhtunkhwa province, relatives of a deceased coronavirus patient vandalized Lady Reading Hospital. They broke down the door of the complex of the hospital.	0	1	1	Health Care at Risk
2020-05-29	2020	Rioters (Pakistan)	South Asia	Pakistan	Sindh	Karachi City		Karachi	24.9056	67.0822	On 29 May 2020, around 70 people attacked doctors and staff at the emergency ward in Civil Hospital in Karachi city (Karachi City, Sindh), after their relative died due to coronavirus. [size=around 70]	0	1	1	ACLED
2020-05-30	2020	Rioters (Argentina)	South America	Argentina	Ciudad Autonoma de Buenos Aires			Buenos Aires	-34.6141	-58.4579	On 30 May 2020, in Buenos Aires (Ciudad Autonoma de Buenos Aires), around 300 people gathered in the Obelisk to demonstrate against the mandatory social isolation imposed by the government since March 2020 because of the coronavirus pandemic. The group claimed that such measure violates their constitutional rights, their freedom and some of them declared that it is a false pandemic. Two health wo…	0	12	3	ACLED
2020-05-31	2020	Protestors	TBA	Indonesia	0	0	0	0	0	0	31 May 2020: In Parumaan village, East Alok district, Sikka regency, East Nusa Tenggara province, a group of women held a demonstration refusing to take swab test for COVID-19. They threw kitchen utensils at the medical staff.	0	2	2	Health Care at Risk
2020-05-31	2020	Protestors	TBA	Mexico	0	0	0	0	0	0	31 May 2020: In Guadalajara city, Jalisco state, the occupants of an ambulance allegedly carrying a coronavirus patient were taken out of the vehicle and beaten by a group of people. The ambulance had clashed with a motorcycle, but the paramedics did not want to help the injured motorcyclist as they were afraid that they were infected with the virus, which angered the crowd.	0	12	2	Health Care at Risk
2020-05-31	2020	Patient or their family member	TBA	Pakistan	0	0	0	0	0	0	31 May 2020: In Rawalpindi city and division, Punjab province, a family attacked the COVID ward in Benazir Bhutto Hospital and injured a nurse after their relative died of coronavirus.	0	1	1	Health Care at Risk
2020-06-01	2020	Patient or their family member	TBA	Colombia	0	0	0	0	0	0	01 June 2020: In Soledad municipality, Atlantico department, a group of relatives of a patient attacked the infrastructure of the University North Hospital, where the patient died due to the coronavirus infection. Members of the hospital have reported various attacks toward them and the infrastructure in the midst of the coronavirus outbreak.	0	1	1	Health Care at Risk
2020-06-02	2020	Rioters (Argentina)	South America	Argentina	Buenos Aires	Loberia		Loberia	-38.1635	-58.782	On 2 June 2020, in Loberia (Buenos Aires), a group threw stones to the house of a health worker, after it became public that she was infected with the coronavirus. No one got injured. [size=no report]	0	3	4	ACLED
2020-06-02	2020	Rioters (India)	South Asia	India	Odisha	Jagatsinghapur	Paradeep Lock	Paradip	20.3163	86.6132	On 2 June 2020, a group of fishermen from Andhra Pradesh assaulted an ASHA health worker in Paradip municipality (Jagatsinghapur, Odisha), resisting to be sent to a local coronavirus quarantine facility. [size=no report]	0	2	2	ACLED
2020-06-03	2020	Patient or their family member	TBA	India	0	0	0	0	0	0	03 June 2020: In Agartala, West Tripura district, Tripura state, a section of coronavirus patients vandalized a COVID-19 care centre in opposition to the poor quality food being served to them in the facility.	0	12	1	Health Care at Risk
2020-06-03	2020	Patient or their family member	TBA	Indonesia	0	0	0	0	0	0	03 June 2020: In the South Maricaya sub-district, Mamajang district, Makassar City, South Sulawesi province, around a hundred people came to a hospital and insisted on taking the body of a COVID-19 victim. They rejected the protocol for COVID-19 victim burials. They brought sharp weapons, and the hospital let them take the body.	0	2	1	Health Care at Risk
2020-06-04	2020	Patient or their family member	TBA	Indonesia	0	0	0	0	0	0	04 June 2020: In Surabaya city, East Java province, hundreds of people rejected the visit of the COVID-19 (Coronavirus) Special Task Force medical staff to their neighborhood. The staff came to prepare the burial of a COVID-19 victim, which was illegally taken by the family and neighbors who didn't want to apply the COVID-19 burial protocol. They pushed the medical staff and hit the ambulance. A …	0	2	2	Health Care at Risk
2020-06-04	2020	Patient or their family member	TBA	Indonesia	0	0	0	0	0	0	04 June 2020: In in Mamunyu sub-district, Mamuju District, Mamuju Regency, West Sulawesi province, three family members of a COVID-19 patient attacked a medical staff member from the COVID-19 Task Force at the patient's house. The patient escaped from a hospital and refused to take a rapid test. The victim of the attack had to go to the hospital.	0	2	2	Health Care at Risk
2020-06-07	2020	Patient or their family member	TBA	India	0	0	0	0	0	0	07 June 2020: In Thoubal district, Manipur province, 32 people quarantined at a coronavirus center vandalized the facility and demanded to be discharged for home quarantine.	0	2	1	Health Care at Risk
2020-06-09	2020	Rioters (India)	South Asia	India	Telangana	Hyderabad	Asifnagar	Hyderabad	17.384	78.4563	On 9 June 2020, family members of a deceased patient being treated for coronavirus assaulted a doctor at Gandhi hospital in Hyderabad city (Hyderabad, TS) following the death of the patient. [size=no report]	0	1	1	ACLED
2020-06-10	2020	Rioters (India)	South Asia	India	Maharashtra	Kolhapur	Karvir	Kolhapur	16.6956	74.2316	Around 10 June 2020 (as reported), four people, including a sitting member of gram panchayat were booked for assaulting an ASHA health worker in Kolhapur city (Kolhapur, Maharashtra) over her refusal to give them extra vials of homeopathic medicine, recommended to improve immunity against the coronavirus. [size=at least 4]	0	1	11	ACLED
2020-06-11	2020	Patient or their family member	TBA	Indonesia	0	0	0	0	0	0	11 June 2020: In Waru district, Pamekasan regency, East Java province, dozens of people intercepted an ambulance on the way to a cemetery. They took a body of a COVID-19 victim from the ambulance, wanting to independently burry the victim without applying the COVID-19 burial protocol. They brought sharp weapons and threatened to attack the medical staff.	0	2	2	Health Care at Risk
2020-06-11	2020	Protestors	TBA	Mexico	0	0	0	0	0	0	11 June 2020: In Villa de las Rosas, Chiapas, a hundred rioters with sticks/bars and their faces covered burned a clinic, the city hall, a house and an ambulance. There were also aggressions to health personnel reported. The events occurred in response to the death of a man from coronavirus and after it was made public that a sanitation campaign was going to take place. The rioters are afraid of …	0	12	1 (3)	Health Care at Risk
2020-06-12	2020	Patient or their family member	TBA	India	0	0	0	0	0	0	12 June 2020: In Mazbat College in Udalguri district, Assam state, some patients at a COVID-19 quarantine center vandalized the college property and burned some of the beds after not being allowed outside the college campus.	0	2	2	Health Care at Risk
2020-06-12	2020	Patient or their family member	TBA	India	0	0	0	0	0	0	12 June 2020: In Maranhol village, Belgaum city, Karnataka state, a group of people attacked a health professional who had come to collect throat swabs for coronavirus tests.	0	11	2	Health Care at Risk
2020-06-13	2020	Rioters (Egypt)	Northern Africa	Egypt	Qalyubia	Al Qanater Al Khayreya		Al Qanatir al Khayriyah	30.1933	31.137	Around 13 June 2020, a group of a deceased patient's relatives attacked a doctor and caused property damage in Al Qanater Hospital in Al Qanatir al Khayriyah (Qalyub, Kalyoubia) after the patient died from coronavirus. There were no lasting injuries or fatalities. [size=no report]	0	1	1	ACLED
2020-06-14	2020	Rioters (Malawi)	Eastern Africa	Malawi	Southern	Blantyre City	Blantyre City	Ndirande	-15.7697	35.0416	On 14 June 2020, 11 health workers and an ambulance driver were beaten and injured by a mob in Ndirande (Blantyre, Southern). The health workers were burying a coronavirus victim at the Malabada Cemetery when the group arrived demanding evidence that the individual had died from coronavirus. [size=no report]	0	12	2	ACLED
2020-06-15	2020	Rioters (Peru)	South America	Peru	Tumbes	Tumbes	Tumbes	Tumbes	-3.5669	-80.4515	On 15 June 2020, in Tumbes city, a group of family members of patients treated in the Carlos Cortez Jimenez hospital staged a demonstration outside the hospital, denouncing improper medical attention after 6 patients died of coronavirus in the previous day. A nurse was beaten and injured by the demonstrators. [size=no report]	0	1	1	ACLED
2020-06-15	2020	Rioters (Sierra Leone)	Western Africa	Sierra Leone	Southern	Bo	Valunia	Baomahun	8.4163	-11.6684	On 15 June 2020, quarantined coronavirus patients demonstrated in Baomahun village (Bo, Southern) over the district response committee's neglect and failure to provide them with food. The demonstrators damaged the hospital and assaulted two health workers. [size=no report]	0	12	1	ACLED
2020-06-16	2020	Rioters (India)	South Asia	India	Manipur	Tamenglong	Tamenglong	Tamenglong	25.0164	93.4854	On 16 June 2020, patients of a coronavirus quarantine centre at Don Bosco School in Tamenglong (Tamenglong district, Manipur) attacked an on duty medical officer in the facility. Four patients leading the mob allegedly assaulted the doctor physically while demanding the discharge slip of a female inmate who had been transferred and shifted to a coronavirus treatment centre in Imphal. [size=at lea…	0	12	1	ACLED
2020-06-21	2020	State military	TBA	Myanmar	0	0	0	0	0	0	21 June 2020: In Nar Khan village, Mongnai Township, Langkho District, Shan State, the Myanmar military battalion 575 destroyed a COVID-19 screening gate that belonged to RCSS. During a video conference, the Myanmar government had promised the RCSS they would supply materials for COVID-19 prevention on 16 June 2020. The Myanmar government then later ordered the RCSS not to carry out COVID-19 prev…	0	12	2	Health Care at Risk
2020-06-22	2020	State military	TBA	Myanmar	0	0	0	0	0	0	22 June 2020: In Loije, Loike Township, on the Sino-Burmese border in Kachin state, the Myanmar military reportedly destroyed a Kachin Independence Organization (KIO) COVID-19 screening checkpoint	0	12	2	Health Care at Risk
2020-06-22	2020	State military	TBA	Myanmar	0	0	0	0	0	0	22 June 2020: Near Lwegel town, Momauk township, Bhamo district, Kachin state, the Myanmar military destroyed a COVID-19 screening gate used by KIA to conduct coronavirus temperature screenings.	0	12	2	Health Care at Risk
2020-06-24	2020	Protestors	TBA	India	0	0	0	0	0	0	24 June 2020: At GTB hospital, Delhi, a mob beat up a hospital security guard and pelted him with stones, accusing him of spreading coronavirus.	0	3	1	Health Care at Risk
2020-06-26	2020	Rioters (Chile)	South America	Chile	Antofagasta	Antofagasta	Antofagasta	Antofagasta	-23.6524	-70.3954	Around 26 June 2020, in Antofagasta (Antofagasta), a group of rioters attacked with rocks and threatened with guns a health worker who was on quarantine after having contact with a patient diagnosed with coronavirus. The victim was forced to be relocated due to the attack. [size=no report]	0	3	4	ACLED
2020-06-26	2020	Protestors	TBA	Mexico	0	0	0	0	0	0	26 June 2020: In San Andres Larrainzar, Chiapas state, more than 50 people destroyed and set on fire a police patrol, an ambulance, and the house of the mayor after a rumor of a possible sanitary operation in the municipality to prevent the spread of coronavirus.	0	11	2	Health Care at Risk
2020-06-27	2020	Patient or their family member	TBA	India	0	0	0	0	0	0	27 June 2020: In Arei panchayat, Jajpur, Odisha, people housed at a quarantine centre attacked a local sarpanch and an ambulance driver after being refused a coronavirus swab test.	0	11	2	Health Care at Risk
2020-06-27	2020	Protestors	TBA	Indonesia	0	0	0	0	0	0	27 June 2020: At a hospital in the Kei Benteng sub-district, Nusaniwe district, Ambon city, Maluku province, a group of people held a demonstration and illegally took away the body of their family member, who died of COVID-19 (Coronavirus). Two rioters hit a medical staff member, blaming the hospital for the death of the victim.	0	1	1	Health Care at Risk
2020-06-30	2020	Rioters (Mexico)	North America	Mexico	Mexico	Almoloya del Rio		Almoloya del Rio	19.1596	-99.4886	Around 30 June 2020 (as reported), in Almoloya del Rio, Mexico, a group of people attacked a nurse and destroyed his car, fearing that he might be infected with the coronavirus. The incident was recorded and posted on social networks. [size=no report]	0	3	4	ACLED
2020-07-01	2020	Rioters (Peru)	South America	Peru	Piura	Sullana	Sullana	Sullana	-4.9039	-80.6853	On 1 July 2020, in Sullana, Piura, a group of coronavirus patients' relatives who broke Hospital rules were assaulted by police officers. The demonstrators confronted the doctors and guards who tried to prevent their entry, so police officers intervened and two people were injured. [size=no report]	0	1	1	ACLED
2020-07-02	2020	Rioters (Tunisia)	Northern Africa	Tunisia	Sousse	Sousse Medina		Sousse	35.8254	10.637	On 2 July 2020, patients clashed with health workers and unionists while they were conducting a two hours strike in Farhat Hached Hospital in Sousse (Sousse Medina, Sousse) to demand the enactment of an organic law for paramedical professions and an increase in hazard allowance during the outbreak of the coronavirus pandemic. [size=no report]	0	11	1	ACLED
2020-07-07	2020	Rioters (Haiti)	Caribbean	Haiti	Centre	Hinche	Hinche	Hinche	19.15	-72.0167	Around 7 July 2020 (as reported), in Hinche, Centre, a group of men threw stones at a doctors' house in demonstration against coronavirus. A number of doctors working at a nearby hospital live in this house. [size=no report]	0	11	4	ACLED
2020-07-08	2020	Rioters (India)	South Asia	India	Jharkhand	Pakur	Pakaur	Rahaspur	24.6646	87.8683	On 8 July 2020, villagers pelted stones at a medical team, including doctors, in Rahaspur village (Pakur, Jharkhand), who had come to take coronavirus patients from the containment zone to a hospital. [size=no report]	0	2	2	ACLED
2020-07-11	2020	Patient or their family member	TBA	Mexico	0	0	0	0	0	0	11 July 2020: In Iztapalapa area of Mexico City, four relatives of a person who died of coronavirus attacked the health personnel who gave them the news. They denied the cause of death was coronavirus and demanded the body of the deceased. No injuries were reported.	0	1	1	Health Care at Risk
2020-07-12	2020	Rioters (India)	South Asia	India	Manipur	Kangpokpi	Saitu-Gamphazol	Motbung	24.9985	93.9046	On 12 July 2020, women patients of a coronavirus quarantine center attacked and assaulted health workers at the facility in Motbung (Senapati district, Manipur), in an attempt to prevent the latter from transferring six coronavirus positive inmates to other quarantine centers. Police were required to bring the situation under control. [size=some]	0	2	1	ACLED
2020-07-13	2020	Rioters (Mexico)	North America	Mexico	Michoacan de Ocampo	Paracho		Paracho de Verduzco	19.6473	-102.049	On 13 July 2020, in Paracho de Verduzco, Michoacan, following the death of a man from coronavirus, a group of people went to the home of the doctor who initially treated the patient to seek revenge for the patient's death. The doctor's son and his wife were beaten. [size=no report]	0	1	4	ACLED
2020-07-20	2020	Protestors	TBA	India	0	0	0	0	0	0	20 July 2020: In Kunzer village, Baramulla district, Jammu and Kashmir territory, locals attacked a medical team after the team had arrived there for sampling due to high number of coronavirus cases.	0	2	2	Health Care at Risk
2020-07-21	2020	Rioters (India)	South Asia	India	West Bengal	Kolkata	Kolkata	Kolkata	22.5728	88.3747	On 21 July 2020, a group of five local residents assaulted the brother of a doctor at Behala in Kolkata city (Kolkata district, West Bengal), against the doctor returning to his house after work, over concerns of the spread of coronavirus in the locality. Police detained the five persons later. [size=5]	0	3	4	ACLED
2020-07-22	2020	Rioters (India)	South Asia	India	Karnataka	Belagavi	Belgaum	Belgaum	15.8521	74.5044	On 22 July 2020, locals and family members of a coronavirus patient pelted stone, set an ambulance on fire and allegedly attacked members of the hospital staff in Belagavi city (Belgaum, KN) after his death at the hospital. [size=no report]	0	1	1	ACLED
2020-07-24	2020	Patient or their family member	TBA	India	0	0	0	0	0	0	24 July 2020: In Agartala, West Tripura district, Tripura, a large number of coronavirus patients staged a blockade at Bhagat Singh COVID care center, preventing the entry of new coronavirus patients into the center. They also verbally abused, poured water and spat on the accompanying medical workers.	0	11	1	Health Care at Risk
2020-07-29	2020	Protestors	TBA	India	0	0	0	0	0	0	29 July 2020: In Khadki town, Pune, Maharashtra, six people opposing the collection of coronavirus swab samples from the family of an infected person assaulted a medical team.	0	2	2	Health Care at Risk
2020-07-29	2020	Rioters (Malawi)	Eastern Africa	Malawi	Central	Nkhotakota	Nkhotakota Boma	Nkhotakota	-12.9292	34.2972	On 29 July 2020, more than 70 villagers threw stones at health workers in the village of Phangwa near Nkhotakota (Nkhotakota, Central) during the burial of a woman who died from the coronavirus. The villagers were accusing the health workers of faking her diagnosis; the woman suffered from an unknown condition for three years. [size=more than 70]	0	1	11	ACLED
2020-07-30	2020	Rioters (Indonesia)	Southeast Asia	Indonesia	East Java	Banyuwangi	Banyuwangi	Banyuwangi	-8.2325	114.358	On 30 July 2020, several people hit a doctor at a hospital in Banyuwangi city, East Java province, after the doctor asked them to wear masks to prevent the spread of coronavirus. [size=several]	0	2	1	ACLED
2020-07-30	2020	Protestors	TBA	South Africa	0	0	0	0	0	0	30 July 2020: In Amatikulu, uThungulu district municipality, KwaZulu-Natal province, community members set Catherine Booth Hospital on fire. The demonstrators were reportedly unhappy about the hospital treating coronavirus patients.	0	3	1	Health Care at Risk
2020-07-31	2020	Rioters (India)	South Asia	India	Gujarat	Gir Somnath	Patan-Veraval	Veraval	20.9077	70.3678	On 31 July 2020, ten persons assaulted a doctor in Veraval town (Gir Somnath, Gujarat) after the death of a woman, suspected to have suffered from coronavirus. Six people were arrested the following day. [size=10]	0	1	1	ACLED
2020-08-01	2020	Protestors	TBA	India	0	0	0	0	0	0	01 August 2020: In Penthakata area of Puri town, Odisha, residents assaulted ASHA and Anganwadi workers demanding the coronavirus test results of four persons following the declaration of the area as a coronavirus containment zone. Police resorted to mild lathi-charges to disperse the locals.	0	12	1	Health Care at Risk
2020-08-03	2020	Law enforcement	TBA	India	0	0	0	0	0	0	03 August 2020: In Barwada locality of Dhanbad city, Dhanbad district, Jharkhand health workers at a hospital were assaulted by six police officers who demanded to be tested for COVID-19 ahead of other people waiting. Three of the police officers were suspended as a result. Source: ACLED1	0	11	1	Health Care at Risk
2020-08-03	2020	Rioters (India)	South Asia	India	Maharashtra	Nashik	Nashik	Nashik	19.9972	73.7909	On 3 August 2020, three people assaulted a doctor at a private hospital in Cidco area of Nashik city (Nashik, Maharashtra), after a delay in presenting a report of the cause of a woman's death. The woman was suspected to be a coronavirus patient. [size=3]	0	1	1	ACLED
2020-08-03	2020	Rioters (Malawi)	Eastern Africa	Malawi	Northern	Likoma	Likoma	Likoma	-12.0575	34.7362	On 3 August 2020, family members of a coronavirus victim attacked health workers in Likoma (Likoma District, Northern), when they attempted to collect blood samples from the group, accusing them of spreading false information regarding the virus. No reports on injuries; no one was arrested. [size=no report]	0	2	2	ACLED
2020-08-08	2020	Rioters (India)	South Asia	India	Kerala	Thiruvananthapuram	Neyyattinkara	Pulluvila	8.3474	77.0377	On 8 August 2020, a group of men attacked patients and healthcare workers at a coronavirus treatment center in Pulluvila village (Thiruvananthapuram, KL) against the restrictions made on fishing in the costal area during the lockdown. Rioters also destroyed medical equipment. [size=no report]	0	2	1	ACLED
2020-08-08	2020	Patient or their family member	TBA	Indonesia	0	0	0	0	0	0	08 August 2020: In Sukun district of Malang City, East Java province, several family members of a coronavirus victim gathered at a hospital in opposition to the coronavirus burial protocol for their relative. They tried to snatch the body using violent methods. After negotiation, they were allowed to join the body's bathing procession and took the body to a mosque for praying ritual prior to the …	0	2	1	Health Care at Risk
2020-08-10	2020	Protestors	TBA	India	0	0	0	0	0	0	10 August 2020: In Mawpat village, South West Khasi Hills district, Meghalaya, a group of people attacked and clashed with volunteers of Hynniewtrep Youth Council (HYC), including local residents of the village, during a sanitization drive intended to limit the spread of coronavirus in the village. Two people were injured.	0	2	2	Health Care at Risk
2020-08-12	2020	Rioters (India)	South Asia	India	Uttar Pradesh	Kushi Nagar	Tamkuhi Raj	Patherwa	26.6847	84.0973	Around 12 August 2020, a mob of villagers attacked a team of health workers, in Pagra Padri village under Patherwa police station of Kushinagar (UP), for collecting samples from coronavirus patients. 5 arrested. [size=at least 5]	0	2	2	ACLED
2020-08-17	2020	Protestors	TBA	Guinea	0	0	0	0	0	0	17 August 2020: In Loilakoro village, near Mandiana town, Kankan a group of youths demonstrated against quarantining 46 workers of a local gold mining company who tested positive for the coronavirus. The demonstrators briefly kidnapped the members of the medical team that conducted the tests. Several were arrested.	0	2	2	Health Care at Risk
2020-08-20	2020	Protestors	TBA	Greece	0	0	0	0	0	0	20 August 2020: On Lesvos island, anti-migrant protestors attacked and set fire to an MSF-run pediatric and sexual reproductive health clinic run outside Moria refugee camp. During the incident, a small group of protestors gathered outside, shouting at and threatening staff while throwing stones into the clinic where approximately 50 staff were working to treat women and children from Moria camp.…	0	12	1	Health Care at Risk
2020-08-20	2020	Rioters (Mexico)	North America	Mexico	Guanajuato	Leon		Leon de los Aldama	21.122	-101.683	On 20 August 2020, in Leon de los Aldama, Guanajuato, a group of people attacked a female nurse who was at the store owned by her family. The participants attacked the nurse accusing her of spreading the coronavirus. The woman was injured. [size=no report]	0	3	4	ACLED
2020-08-25	2020	Rioters (Indonesia)	Southeast Asia	Indonesia	Riau Islands	Batam	Sei Beduk	Batam	1.0521	104.028	On 25 August 2020, several family members of a coronavirus victim snatched the body of the victim from a hospital in Batam city (Riau Islands province). They hit a doctor who tried to intervene. [size=several]	0	12	1	ACLED
2020-08-29	2020	Rioters (Nigeria)	Europe	Italy	Lazio	Roma		Rome - City Center	41.8894	12.4906	On 29 August 2020, in the afternoon, three Nigerian citizens, who tested positive to coronavirus, rioted at a hospital in Rome - City Center (Roma, Lazio), after they were told they could not be discharged. The three attacked, bit, and slightly injured both military people and healthcare workers and damaged the hospital's ward. [size=3]	0	2	1	ACLED
2020-09-01	2020	Rioters (India)	South Asia	India	Haryana	Fatehabad	Ratia	Nakta	29.6231	75.3806	On 1 September 2020, a mob of villagers attacked a team of health workers, in Nakta in Fatehabad (Haryana), and destroyed coronavirus testing and sample kits, while they were collecting samples. [size=no report]	0	2	2	ACLED
2020-09-05	2020	Patient or their family member	TBA	India	0	0	0	0	0	0	05 September 2020: In Nagpur city, Maharashtra state, relatives of a coronavirus victim dragged out an ambulance driver and beat him in Ganagbai Ghat road, demanding to see the body of the deceased.	0	11	2	Health Care at Risk
2020-09-06	2020	Rioters (India)	South Asia	India	West Bengal	Kolkata	Kolkata	Kolkata	22.5728	88.3747	On 6 September 2020, a mob vandalized an ICU and assaulted some health workers at a private hospital in Kolkata (Kolkata district, West Bengal), over shortage of beds at the ICU amidst the coronavirus pandemic. [size=no report]	0	1	1	ACLED
2020-09-08	2020	Protestors	TBA	India	0	0	0	0	0	0	08 September 2020: In Kokri Buttran village, Moga district, Punjab state, a mob of villagers attacked and threatened burn a team of health workers as they tried to cremate a coronavirus patient.	0	2	2	Health Care at Risk
2020-09-08	2020	Rioters (India)	South Asia	India	Punjab	Moga	Moga	Kokri Buttran	30.8745	75.3447	On 8 September 2020, a mob of villagers attacked and threatened burn a team of health workers, in Kokri Buttran village in Moga (Punjab), as they tried to cremate a coronavirus patient. [size=no report]	0	11	2	ACLED
2020-09-09	2020	Rioters (Colombia)	South America	Colombia	Norte de Santander	Cucuta		Cucuta	7.8939	-72.5078	Around 9 September 2020, in Cucuta, Norte de Santander, a group of health workers were attacked with stones by unidentified individuals while they were conducting controls and procedures regarding the coronavirus outbreak. No injuries reported. [size=no report]	0	2	2	ACLED
2020-09-13	2020	Protestors	TBA	India	0	0	0	0	0	0	13 September 2020: In Kakardha village, Sheopur district, Madhya Pradesh state, villagers threw stones and sticks at an ambulance to prevent it from transporting a coronavirus patient. A video of the incident went viral on social media.	0	11	2	Health Care at Risk
2020-09-19	2020	Rioters (India)	South Asia	India	Madhya Pradesh	Ujjain	Ujjain	Ujjain	23.1823	75.7764	On 19 September 2020, relatives of a coronavirus victim attacked doctors and paramedical staff in Ujjain town (Ujjain, MP), after being informed about the death of their relative. Police booked four people. [size=at least 4]	0	1	1	ACLED
2020-10-02	2020	Rioters (India)	South Asia	India	Gujarat	Rajkot	Rajkot	Rajkot	22.2916	70.7932	On 2 October 2020, a mob of around 4 people attacked and beat up health workers in Saurashtra Cancer Hospital, Rajkot (Gujarat), when asked to not make loud noises in a coronavirus care centre. [size=around 4]	0	12	1	ACLED
2020-10-03	2020	Rioters (Tunisia)	Northern Africa	Tunisia	Kasserine	Ezzouhour		Kasserine	35.1676	8.8365	On 3 October 2020, the family of a coronavirus patient threw stones at health workers in Kasserine (Ezzouhour, Kasserine) to prevent them from transporting the patient to a public health institution. [size=no report]	0	11	2	ACLED
2020-10-10	2020	Opposition group	TBA	Syria	0	0	0	0	0	0	10 October 2020: In Ar-Raqqa city, medical staff in the National Hospital were attacked by Syrian Democratic Forces after one of their relatives died from Coronavirus. Three nurses were injured.	0	1	1	Health Care at Risk
2020-10-18	2020	Rioters (Tunisia)	Northern Africa	Tunisia	Kasserine	Ezzouhour		Kasserine	35.1676	8.8365	On 18 October 2020, family members of a deceased coronavirus victim stormed the local hospital in Kasserine (Ezzouhour, Kasserine) and attacked health workers to forcibly take out the body of the deceased victim from the hospital's morgue. [size=no report]	0	1	1	ACLED
2020-10-23	2020	Rioters (Tunisia)	Northern Africa	Tunisia	Kasserine	Sbeitla		Sbeitla	35.2315	9.1232	On 23 October 2020, family members of a deceased coronavirus victim stormed the local hospital in Sbeitla (Kasserine) and attacked health workers to forcibly take out the body of the deceased victim from the hospital's morgue. [size=no report]	0	1	1	ACLED
2020-11-08	2020	Rioters (Tunisia)	Northern Africa	Tunisia	Kairouan	Kairouan Nord		Kairouan	35.6781	10.0963	On 8 November 2020, family members and relatives of a deceased coronavirus patient violently attacked health workers and destroyed health equipment at the Ibn Al Jazzar hospital in Kairouan (Kairouan Sud, Kairouan) in order to take the body of the deceased out of the hospital. [size=no report]	0	1	1	ACLED
2020-12-15	2020	Opposition group	TBA	DRC	0	0	0	0	0	0	Around 15 December 2020: In Kananga town, Kananga, Kasai-Central, at least 10 doctors and one nurse were attacked and wounded by unidentified armed men while the victims were working as members of coronavirus response teams.	0	11	11	Health Care at Risk
2021-01-05	2021	Rioters (Chile)	South America	Chile	Metropolitana	Maipo	San Bernardo	San Bernardo	-33.5922	-70.6996	On 5 January 2021, in San Bernardo, Metropolitana region, rioters attacked hospital staff and damaged equipment in a health center. Riots broke out following the denial of hospital authorities to move the body of a person deceased by coronavirus complications. [size=no report]	0	1	1	ACLED
2021-01-23	2021	Rioters (Malawi)	Eastern Africa	Malawi	Southern	Zomba	Zomba	Malemia	-15.2647	35.3819	On 23 January 2021, villagers threw stones at 6 health workers in the Mkwate village, under the jurisdiction of the chief of Malemia (Zomba, Malawi). The workers were tasked with the disinfection of the body of a person who died from coronavirus. The villagers accused the health workers of receiving a lot of money for the task. 1 health worker was injured. [size=no report]	0	12	2	ACLED
2021-01-24	2021	Protestors	TBA	Philippines	0	0	0	0	0	0	24 January 2021: In Urk town, Flevoland province, a group of youths stormed and set on fire a COVID-19 testing centre during a protest against a nationwide curfew.	0	2	1	Health Care at Risk
2021-02-04	2021	Patient or their family member	TBA	Cameroon	0	0	0	0	0	0	04 February 2021: In Bamenda city, Northwest region, youths attacked health care workers overseeing the burial of a pastor who had recently died of COVID-19. After forcing the COVID-19 team away from the premises, they confiscated the coffin and carried out the burial without following the health measures imposed by the health care team.	0	2	2	Health Care at Risk
2021-02-07	2021	Patient or their family member	TBA	Nigeria	0	0	0	0	0	0	07 February 2021: In Owo city, Ondo state, relatives of a dead COVID-19 patient assaulted several nurses at the Federal Medical Centre, two of which were seriously injured and were subsequently hospitalised. The following day, nurses started a strike, refusing to return to work until adequate security was provided.	0	1	1	Health Care at Risk
2021-02-08	2021	Rioters (Malawi)	Eastern Africa	Malawi	Central	Dowa	TA Dambe	Kayembe	-13.6349	33.6	On 8 February 2021, villagers attacked an ambulance carrying a coronavirus victim and health workers tasked to bury him in Kayembe (Mchinji, Central). The villagers claimed that the individual did not die from the virus. No reports on injuries. [size=no report]	0	12	2	ACLED
2021-02-16	2021	Protestors	TBA	India	0	0	0	0	0	0	16 February 2021: In Kaithal city, Kaithal district, Haryana state, farmers opposed to the COVID-19 vaccination tried to chase doctors and health care staff from the vaccination centre of the city. This attack took place in a context of ongoing protests against the recent farming reforms.	0	5	1	Health Care at Risk
2021-02-16	2021	Rioters (Malawi)	Eastern Africa	Malawi	Southern	Machinga	Liwonde Town	Liwonde	-15.0667	35.2254	Around 16 February 2021 (as reported), a health worker was beaten and severely injured by a group in Liwonde (Machinga, Southern). The victim was delivering the body of a bishop who died from coronavirus for burial and was attacked by people who claimed that the deceased did not die from the virus. The ambulance was also destroyed. [size=no report]	0	1	2	ACLED
2021-03-01	2021	Rioters (Zambia)	Southern Africa	Zambia	North-Western	Zambezi		Zambezi	-13.55	23.1167	On 1 March 2021, health workers were attacked with stones and other objects by a mob in Zambezi (Zambezi, North-West) as they were trying to deliver the body of a teacher suspected of having died from coronavirus for burial. The group also damaged the school the man had worked at. [size=no report]	0	3	2	ACLED
2021-03-03	2021	Opposition group	TBA	Netherland	0	0	0	0	0	0	03 March 2021: In Bovenkarspel town, Stede Broec municipality, North Holland province, unidentified perpetrators detonated a crude pipe bomb outside a COVID-19 drive-through testing site, shattering half a dozen windows. The centre was closed until explosives experts examined the site.	0	2	1	Health Care at Risk
2021-03-10	2021	Opposition group	TBA	Somalia	0	0	0	0	0	0	10 March 2021: In Karan district, Mogadishu, an IED targeted a government vehicle that utilised loudspeakers used to promote COVID-19 prevention measures.	0	2	2	Health Care at Risk
2021-03-25	2021	Rioters (India)	South Asia	India	Maharashtra	Pune	Pune City	Pune	18.5195	73.8553	On 25 March 2021, 4 men attacked two doctors at a private hospital in Pune city (Maharashtra), over a dispute over their friend's coronavirus treatment. No injuries or fatalities reported. [size=4]	0	1	1	ACLED
2021-03-25	2021	Rioters (Mexico)	North America	Mexico	Oaxaca	Villa de Zaachila		Villa de Zaachila	16.9507	-96.7506	On 25 March 2021, in Villa de Zaachila, Oaxaca, after a vaccination center ran out of coronavirus vaccines, a group of people held vaccination center officials and doctors to demand more vaccines. The doctors and officials were released after the arrival of more vaccines. [size=no report]	0	4	1	ACLED
2021-04-03	2021	Rioters (India)	South Asia	India	Maharashtra	Nashik	Nashik	Nashik	19.9972	73.7909	On 3 April 2021, 4 men attacked hospital staff and vandalised the hospital and pharmacy at a private hospital in Nashik city (Maharashtra), over the death of an elderly woman related to the assailants who was admitted at the hospital for coronavirus treatment. 1 person injured. Police have arrested all 4 assailants. [size=4]	0	1	1	ACLED
2021-04-03	2021	Rioters (Tunisia)	Northern Africa	Tunisia	Kairouan	Kairouan Nord		Kairouan	35.6781	10.0963	On 3 April 2021, family members of a coronavirus deceased patient violently attacked health workers and destroyed health equipment in Ibn Jazzar hospital in Kairouan (Kairouan Sud, Kairouan) and tried to recuperate the dead body of the coronavirus victim to burry him in breach of the medical protocol. [size=no report]	0	1	1	ACLED
2021-04-05	2021	Rioters (India)	South Asia	India	Gujarat	Vadodara	Vadodara	Vadodara	22.2994	73.2081	On 5 April 2021, a mob of locals attacked a hospital staffer and vandalised the premises of a private coronavirus empaneled hospital in Vadodara city (Gujarat), over the death of a woman related to the assailants who was admitted at the hospital for coronavirus treatment. The assailants claim that the woman's death was due to medical negligence. 1 person injured. Police have booked cases against …	0	1	1	ACLED
2021-04-11	2021	Rioters (India)	South Asia	India	Gujarat	Ahmadabad	Ahmadabad City	Ahmedabad	23.0257	72.5872	On 11 April 2021, a mob of locals attacked hospital staff and vandalised the ICU ward of a civil hospital in Ahmedabad city (Ahmadabad, Gujarat), over the death of a woman related to the assailants who was admitted at the hospital for coronavirus treatment. No injuries or fatalities reported. Police arrested the family members and later released them. [size=no report]	0	1	1	ACLED
2021-04-11	2021	Rioters (India)	South Asia	India	Madhya Pradesh	Khandwa	Khandwa	Khandwa	21.8251	76.3525	On 11 April 2021, a mob of locals attacked a team of health workers in a village in Khandwa district (MP), after the health team tried to take a coronavirus patient to the hospital. Police intervened to rescue the health workers, during which they attacked the locals. Several reported injured. 2 police personnel have been suspended as a result of the incident. [size=no report]	0	2	2	ACLED
2021-04-16	2021	Opposition group	TBA	Mexico	0	0	0	0	0	0	16 April 2021: In Tangancicuaro municipality, Michoacan state, gunfire of unidentified origin struck an ambulance of a COVID-19 vaccination squad as well as members of the state police.	0	11	2	Health Care at Risk
2021-04-18	2021	Rioters (India)	South Asia	India	Uttar Pradesh	Ballia	Bairia	Bairia	25.7675	84.4821	On 18 April 2021, a mob of 60 villagers attacked a team of health workers including two doctors, a lab assistant and the driver, near Paswan Chowk Village under Bairia Police Station (Ballia district, UP), when the team arrived to examine a coronavirus patient. 4 health workers injured. 2 booked. [size=60]	0	2	2	ACLED
2021-04-21	2021	Rioters (India)	South Asia	India	Maharashtra	Pune	Pune City	Pune	18.5195	73.8553	On 21 April 2021, a mob of 15-20 people vandalised a hospital and attacked a doctor with an iron rod at a hospital in Pune city (Maharashtra), over the death of a patient related to the assailants who was admitted at the hospital for coronavirus treatment. The doctor sustained injuries. Police later arrested 15-20 people. [size=15-20]	0	1	1	ACLED
2021-04-22	2021	Rioters (India)	South Asia	India	Manipur	Bishnupur	Bishnupur	Bishnupur	24.6305	93.7597	On 22 April 2021, a mob of bandh (lockdown) supporters attacked a female healthcare worker traveling on a coronavirus vaccination duty at Phoujagai (coded as Bishnupur, Bishnupur district, Manipur). The bandh was organized against the non-release of MGNREGA fund. [size=no report]	0	11	2	ACLED
2021-04-26	2021	Rioters (India)	South Asia	India	Maharashtra	Nashik	Nashik	Nashik	19.9972	73.7909	On 26 April 2021, a mob of around 300 locals attacked health workers and vandalised an ICU ward at two private hospitals in Nashik city (Maharashtra), over the deaths of a patient related to the assailants who was admitted at the hospital for coronavirus treatment. No injuries or fatalities reported. 1 person arrested. [size=around 300]	0	1	1	ACLED
2021-04-27	2021	Rioters (India)	South Asia	India	Gujarat	Morbi	Morvi	Morbi	22.8173	70.8377	On 27 April 2021, a coronavirus patient's kin assaulted a doctor at the civic hospital in Morbi city (Gujarat), over the delay in admission of the coronavirus patient. [size=no report]	0	1	1	ACLED
2021-04-27	2021	Rioters (India)	South Asia	India	Jharkhand	Ranchi	Kanke	Kanke	23.4347	85.3205	On 27 April 2021, a mob of locals attacked doctors and vandalised a hospital in Kanke town (Ranchi, Jharkhand), over the death of 2 patients related to the assailants who were admitted at the hospital for coronavirus treatment. 1 doctor and 4 nurses sustained injuries. [size=no report]	0	1	1	ACLED
2021-04-28	2021	Rioters (India)	South Asia	India	Bihar	Patna	Sampatchak	Patna	25.5941	85.1356	On 28 April 2021, a mob of locals related to admitted coronavirus patients, attacked doctors and vandalised a coronavirus hospital in Patna city (Bihar). Apart from damaging furniture and equipment, rioters also stopped oxygen supply within the hospital. No injuries or fatalities reported. [size=no report]	0	11	1	ACLED
2021-04-30	2021	Rioters (India)	South Asia	India	Haryana	Gurugram	Gurgaon	Gurgaon	28.4601	77.0263	On 30 April 2021, a mob attacked health workers including doctors and hospital staff, in Gurgaon (Gurugram, Haryana), alleging medical negligence after the death of relatives due to oxygen shortage in hospitals, during the coronavirus pandemic. [size=no report]	0	1	1	ACLED
2021-04-30	2021	Rioters (India)	South Asia	India	Uttar Pradesh	Meerut	Meerut	Meerut	28.98	77.7063	On 30 April 2021, a mob of at least 20 contractual sanitation staff attacked doctors and vandalized a hospital, at Lala Lajpat Rai Medical College in Meerut (Meerut district, UP), when asked to pack the bodies of coronavirus victims without adequate protective gear. 2 arrested. [size=at least 20]	0	3	1	ACLED
2021-05-03	2021	Rioters (India)	South Asia	India	Arunachal Pradesh	Papum Pare	Itanagar	Naharlagun	27.0985	93.6946	On 3 May 2021, the family of a patient vandalized a hospital and manhandled the doctors and staff at Naharlagun (Papum Pare district, Arunachal Pradesh) after the death of a patient amid the coronavirus pandemic. [size=no report]	0	1	1	ACLED
2021-05-04	2021	Rioters (India)	South Asia	India	Karnataka	Mandya	Mandya	Mandya	12.5223	76.8974	On 4 May 2021, family members of a coronavirus patient, who died during treatment, assaulted a female doctor in Mandya (Mandya, KN) holding her responsible for his death. [size=no report]	0	1	1	ACLED
2021-05-04	2021	Rioters (India)	South Asia	India	Bihar	Muzaffarpur	Musahri	Uma Nagar	26.1678	85.3939	On 4 May 2021, a mob of locals related to a coronavirus patient, assaulted health workers and vandalized a hospital in Uma Nagar town (Muzaffarpur, Bihar), after the patient's death. No injuries or fatalities reported. [size=no report]	0	1	1	ACLED
2021-05-04	2021	Rioters (India)	South Asia	India	Haryana	Nuh	Nuh	Nalhar	28.0946	76.9867	On 4 May 2021, a mob attacked and pelted stones on health workers, in Nalhar (Nuh district, Haryana), when they attempted to shift ventilators to other cities during the second wave of coronavirus. 3 policemen injured. [size=no report]	0	12	2	ACLED
2021-05-04	2021	Rioters (India)	South Asia	India	Bihar	Vaishali	Hajipur	Hajipur	25.6861	85.2143	On 4 May 2021, a mob of several locals related to a coronavirus patient, assaulted health workers and vandalized a hospital in Hajipur town (Vaishali, Bihar), after the patient's death. No injuries or fatalities reported. [size=several]	0	1	1	ACLED
2021-05-05	2021	Rioters (India)	South Asia	India	Uttar Pradesh	Pratapgarh	Pratapgarh	Pratapgarh	25.8951	81.9424	On 5 May 2021, people allegedly assaulted hospital staffs, at Pratapgarh district hospital in Pratapgarh (Pratapgarh district, UP), following arguments over shortage of oxygen in hospitals, during the coronavirus pandemic. 2 arrested. [size=no report]	0	1	1	ACLED
2021-05-06	2021	Rioters (India)	South Asia	India	Jharkhand	Palamu	Medininagar	Daltonganj	24.0397	84.0658	On 6 May 2021, a mob of locals attending to a coronavirus patient, assaulted doctors and nurses at a hospital in Daltonganj city (Palamu, Jharkhand), after the patient's condition worsened. The mob also ripped the clothes of a female doctor. No injuries or fatalities reported. [size=no report]	0	1	1	ACLED
2021-05-06	2021	Rioters (India)	South Asia	India	Gujarat	Surat	Surat City	Surat	21.1959	72.8302	On 6 May 2021, a mob of locals attacked a medical team administering coronavirus vaccinations in Surat city (Gujarat), following an argument over who will receive the vaccination first. A doctor and two medical staff members sustained minor injuries. [size=no report]	0	4	1	ACLED
2021-05-07	2021	Rioters (Papua New Guinea)	Oceania	Papua New Guinea	Southern Highlands	Mendi-Munihu		Mendi	-6.1494	143.649	On 7 May 2021, crowds demonstrated against the coronavirus vaccination program and threw objects at the health workers in Mendi (Southern Highlands), denouncing the vaccines as having side effects and deploring the state of the health sector during the pandemic. [size=no report]	0	5	11	ACLED
2021-05-09	2021	Protestors	TBA	India	0	0	0	0	0	0	09 May 2021: In Thane district, Maharashtra state, local residents assaulted a doctor and a nurse at a hospital after learning that, upon government orders, the hospital was setting aside half of the beds for COVID-19 patients.	0	3	1	Health Care at Risk
2021-05-09	2021	Rioters (India)	South Asia	India	Rajasthan	Nagaur	Makrana	Makrana	27.0436	74.7244	On 9 May 2021, a mob of around 8 locals, attacked doctors and nurses at a government hospital in Makrana town (Nagaur, Rajasthan), after a coronavirus patient passed away due to an oxygen shortage. No injuries or fatalities reported. [size=around 8]	0	1	1	ACLED
2021-05-12	2021	Rioters (India)	South Asia	India	Jharkhand	Palamu	Medininagar	Daltonganj	24.0397	84.0658	On 12 May 2021, a mob of locals attending to a coronavirus patient attacked doctors and nurses at a hospital in Daltonganj city (Palamu, Jharkhand), after the patient passed away. 2 people have been arrested. No injuries or fatalities reported. [size=no report]	0	1	1	ACLED
2021-05-18	2021	Rioters (India)	South Asia	India	Uttar Pradesh	Aligarh	Koil	Aligarh	27.8814	78.0746	On 18 May 2021, a mob attacked health workers, in Saha Nagar Sarola village, in Aligarh district (Koil, Aligarh district, UP), while they arrived to collect coronavirus samples in the village. [size=no report]	0	2	2	ACLED
2021-05-22	2021	Rioters (India)	South Asia	India	Jammu and Kashmir	Bandipora	Sonawari	Ashtangoo	34.4128	74.541	On 22 May 2021, locals pelted stones at health workers who were sampling for the coronavirus pandemic at Ashtangoo village (Bandipora district, J&K) when the medical team tried to videograph them. [size=no report]	0	2	2	ACLED
2021-05-27	2021	Rioters (India)	South Asia	India	Punjab	Ludhiana	Raikot	Racchhin	30.6539	75.7404	On 27 May 2021, a mob attacked a team of health workers, in Racchhin village (Raikot, Ludhiana district, Punjab), when they arrived to get coronavirus samples. 1 health worker injured. [size=no report]	0	2	2	ACLED
2021-05-29	2021	Rioters (Tunisia)	Northern Africa	Tunisia	Gafsa	Mdhila		Mdhilla	34.251	8.747	On 29 May 2021, relatives and family members of a coronavirus disease patient violently aggressed a team of health workers inside a cemetery in Mdhilla (Mdhila, Gafsa) and tried to redeem the deceased's corpse to bury it against the coronavirus protocol. [size=no report]	0	1	2	ACLED
2021-06-01	2021	Rioters (India)	South Asia	India	Assam	Hojai	Lanka	Udali	25.9187	93.0044	On 1 June 2021, a mob of family members of a Coronavirus patient assaulted a doctor of the Covid care centre at Udali (Hojai district, Assam) following the death of coronavirus positive person. Police arrested all 24 persons who were part of the mob. [size=24]	0	1	1	ACLED
2021-06-01	2021	Rioters (India)	South Asia	India	Jharkhand	Khunti	Khunti	Torpa	23.0674	85.2754	On 1 June 2021, a mob of locals attacked health workers in Torpa village (Khunti, Jharkhand), when they visited the village to raise coronavirus awareness. No injuries or fatalities reported. [size=no report]	0	2	2	ACLED
2021-06-01	2021	Rioters (India)	South Asia	India	Maharashtra	Palghar	Palghar	Manor	19.7232	72.9305	On 1 June 2021, a mob of 10 locals attacked and injured a team of 5 doctors and health workers in Ganje-Jayshet village under Manor police limits (Palghar, Maharashtra), while they were trying to conduct coronavirus tests in the village. The mob manhandled the health workers and damaged their vehicle. Police have arrested 2 men. [size=10]	0	2	2	ACLED
2021-06-02	2021	Rioters (Angola)	Middle Africa	Angola	Luanda	Viana	Viana Sede	Viana	-8.9025	13.3722	Around 2 June 2021 (as reported), friends and family of a coronavirus victim attacked and injured a doctor inside a hospital in Viana (Vianda, Luanda) as the group demanded answers the man's death. The group also marched to the Health Ministry. [size=no report]	0	1	1	ACLED
2021-06-05	2021	State military	TBA	Myanmar	0	0	0	0	0	0	05 June 2021: In Shwe Nyaung Pin village, Mogok city, a healthcare worker who had been volunteering at COVID-19 quarantine centers was abducted by SAC soldiers from his home.	0	11	4	Health Care at Risk
2021-06-08	2021	Rioters (Nepal)	South Asia	Nepal	Bagmati	Bhaktapur		Suryabinayak	27.6575	85.4239	Around 8 June 2021 (as reported), a group of youths demonstrated and assaulted the health workers at a health post in Katunje locality of Suryabinayak municipality-5 (Bhaktapur district), demanding coronavirus vaccination despite falling outside the eligible age bracket for receiving the vaccination. Police were deployed to take the situation under control. [size=no report]	0	4	1	ACLED
2021-06-08	2021	Rioters (Paraguay)	South America	Paraguay	Asuncion	Santisima Trinidad		Asuncion	-25.2898	-57.5896	On 8 June 2021, in Asuncion (Asuncion), a group of health workers gathered in front of the Ministry of Public Health to report the lack of basic supplies to avoid the spread of the coronavirus at the hospitals, besides demanding a maximum of 12-hours working shifts for all healthcare workers. An anti-vaccine group repudiated the group's opinions, and they clashed, leading to the national police's…	0	5	3	ACLED
2021-06-22	2021	Rioters (India)	South Asia	India	Assam	Hailakandi	Katlichara	Dholai Molai	24.4536	92.5704	On 22 June 2021, four people physically and verbally assaulted a female health worker at Dholai Molai (Hailakandi district, Assam) during an ongoing coronavirus vaccination drive. [size=no report]	0	5	2	ACLED
2021-06-23	2021	Rioters (Iran)	Middle East	Iran	Bushehr	Tangestan	Central	Ahram	28.8826	51.2746	On 23 June 2021, a health worker was beaten and injured by rioters in Tangestan county (Bushehr) for attempting to enforce coronavirus health and safety regulations. Coded at Ahram. [size=no report]	0	2	2	ACLED
2021-06-26	2021	Rioters (Nepal)	South Asia	Nepal	Bagmati	Dolakha		Tamakoshi	27.5426	86.1239	On 26 June 2021, a group of four people assaulted a doctor and an office assistant at the COVID-19 (coronavirus) Hospital in Tamakoshi rural municipality (Dolakha district). The incident occurred after the health workers asked the group to go to another hospital for non-coronavirus related treatment, since their hospital was dedicated to treating coronavirus patients only. Police arrested all the…	0	1	1	ACLED
2021-06-30	2021	Rioters (India)	South Asia	India	Uttar Pradesh	Gautam Buddha Nagar	Gautam Buddha Nagar	Noida	28.5363	77.3807	On 30 June 2021, a mob attacked 2 doctors, in Gautam Buddha Nagar district (UP), coded as Noida, for allegedly spreading coronavirus. 2 doctors injured. [size=no report]	0	3	11	ACLED
2021-07-04	2021	Rioters (Indonesia)	Southeast Asia	Indonesia	Lampung	Bandar Lampung	North Teluk Betung	Bandar Lampung	-5.4291	105.261	On 4 July 2021, three people beat up a nurse at a Kedaton Health Center in Bandar Lampung city (Lampung province) after the victim refused to give the clinic's oxygen tank to the perpetrators. They wanted to borrow the tank for their family member who was in self-isolation for coronavirus. The victim sustained bruises and a head injury. [size=three]	0	1	1	ACLED
2021-07-09	2021	Rioters (Colombia)	South America	Colombia	Atlantico	Piojo		Piojo	10.7485	-75.1082	Around 9 July 2021, in Piojo (Atlantico), a doctor reported that workers of the mayor's office and relatives of these attacked him after he declined to apply coronavirus vaccines to the family of the officials. According to the victim, the group attempted to evade vaccination requirements. Rioters beat the victim up at his office. [size=no report]	0	4	1	ACLED
2021-07-13	2021	Rioters (Namibia)	Southern Africa	Namibia	Zambezi	Katima Mulilo Urban		Katima Mulilo	-17.5	24.2667	On 13 July 2021, two male nurses were attacked and injured by three individuals (one of them, a police officer) at the Katima Mulilo State Hospital's coronavirus ward (Katima Mulilo Urban, Zambezi) while in the process of allowing the family members to view the body of a family member. [size=3]	0	11	1	ACLED
2021-07-16	2021	Rioters (Indonesia)	Southeast Asia	Indonesia	East Java	Bondowoso	Tamanan	Kemirian	-8.0238	113.839	On 16 July 2021, a group of people intercepted an ambulance in Kemirian village (Tamanan district, Bondowoso regency, East Java province) to snatch a coronavirus victim's body. They took the body from the coffin, burned the coffin, and held a funeral without the coronavirus protocol. The health workers and burial team left the scene to avoid chaos. [size=no report]	0	1	2	ACLED
2021-07-19	2021	State military	TBA	Myanmar	0	0	0	0	0	0	19 July 2021: In North Dagon township, Yangon city, armed SAC forces raided the offices of a charity group offering COVID-19 treatment and arrested two physicians. In addition, 23 oxygen tanks were seized, along with medication and PPE equipment.	0	12	1	Health Care at Risk
2021-07-19	2021	State military	TBA	Myanmar	0	0	0	0	0	0	19 July 2021:In South Okkalapa Township, Yangon city, three volunteer physicians received a phone-call requesting assistance in treating a COVID-19 patient in their home. Upon arrival at the home, they were arrested by armed SAC forces	0	12	2	Health Care at Risk
2021-07-25	2021	Rioters (Poland)	Europe	Poland	Mazowieckie	Grodziski		Grodzisk Mazowiecki	52.107	20.631	On 25 July 2021, an unidentified group attacked the staff of an coronavirus vaccination point in Grodzisk Mazowiecki and tried to damage its equipment. At least one health worker was slightly injured. Law enforcers detained two individuals. [size=no report]	0	5	1	ACLED
2021-07-26	2021	Rioters (Bolivia)	South America	Bolivia	La Paz	Murillo	Nuestra Senora de La Paz	La Paz	-16.4957	-68.1336	On 26 July 2021, in La Paz (Nuestra Senora de La Paz), a group of senior citizens staged a demonstration outside the San Andres Mayor University's medicine faculty to complain about not receiving the second doses of Sputnik V coronavirus vaccine because of the lack of vaccines available. They started to attack the health workers who were in the area. [size=no report]	0	4	1	ACLED
2021-07-31	2021	Rioters (Nepal)	South Asia	Nepal	Bagmati	Kathmandu		Tokha	27.75	85.3333	On 31 July 2021, some people assaulted a health worker at the premises of Grande Hospital in Tokha municipality (Kathmandu district), after the health worker refused to administer coronavirus vaccine to them, on the ground that they did not belong to the age group for vaccine eligibility as specified by the Nepal government. [size=no report]	0	4	1	ACLED
2021-08-02	2021	Rioters (India)	South Asia	India	Kerala	Thiruvananthapuram	Neyyattinkara	Parassala	8.3386	77.1542	On 2 August 2021, three men attacked a doctor and 2 other hospital staff in Parassala town (Thiruvananthapuram, KL) after the doctor urged the men to wear masks to protect them against Coronavirus. [size=3]	0	2	1	ACLED
2021-08-15	2021	Rioters (Indonesia)	Southeast Asia	Indonesia	West Nusa Tenggara	Bima	Bolo	Bolo	-8.5044	118.619	On 15 August 2021, a group of people brought sharp weapons and damaged the hospital facilities at Bima Regency Hospital in Bolo district (Bima regency, West Nusa Tenggara province). They opposed a coronavirus testing for their relative who sustained an arrow wound and demanded the hospital staff operate on the patient immediately. No casualties were reported. [size=no report]	0	1	1	ACLED
2021-08-29	2021	Rioters (Solomon Islands)	Oceania	Solomon Islands	Guadalcanal			Honiara	-9.438	159.97	On 29 August 2021, a land cruiser, as well as a bus used by health workers, were stoned at Kaibia heights and Area 3, respectively, in Honiara (Guadalcanal). The bus had two of its windows smashed. The health workers and the drivers were not injured. The vehicles that were targeted were either transporting nurses back home or were offering logistical support to the coronavirus lockdown operations…	0	12	2	ACLED
2021-08-29	2021	Rioters (Solomon Islands)	Oceania	Solomon Islands	Guadalcanal			Lungga	-9.4289	160.046	On 29 August 2021, a land cruiser was stoned in Lungga (Guadalcanal).The health workers and the drivers were not injured. The targeted vehicle was either transporting nurses back home or was offering logistical support to the coronavirus lockdown operations. [size=no report]	0	12	2	ACLED
2021-09-04	2021	Patient or their family member	TBA	Ghana	0	0	0	0	0	0	As reported on 04 September 2021: In Accra, a doctor was attacked with a fork by a Nigerian singer and his two colleagues after they were quarantined for testing positive for COVID-19. They were deported, fined GHS2,000, and given a three-month entry ban.	0	2	1	Health Care at Risk
2021-09-21	2021	Rioters (Cameroon)	Middle Africa	Cameroon	Centre	Mfoundi	Yaounde 1	Yaounde	3.8667	11.5167	On 21 September 2021, one mother and her children attacked a female medical doctor at the coronavirus response center of the Central Hospital of Yaounde city, Yaounde 1 subdivision (Mfoundi, Centre) for an unspecified reason. The victim was left unconscious and incapacitated. [size=no report]	0	11	1	ACLED
2021-09-28	2021	Rioters (Indonesia)	Southeast Asia	Indonesia	Aceh	Southwest Aceh	Susoh	Susoh	3.7241	96.8186	On 28 September 2021, dozens of fisherfolks and fish sellers destroyed a coronavirus vaccination center at Ujung Serangga Port and Fishmarket in Susoh district (Southwest Aceh regency, Aceh province). They opposed the vaccination program in the location as it discouraged customers from visiting the port. They damaged the vaccination booth, chairs, tables, vaccines vials, syringes, and medicines. …	0	5	1	ACLED
2021-10-04	2021	Rioters (Guatemala)	Central America	Guatemala	Alta Verapaz	Fray Bartolome de las Casas		Maguila	15.7681	-89.8743	On 4 October 2021, in Maguila, Fray Bartolome de las Casas, Alta Verapaz, local inhabitants held 17 nurses hostages and destroyed coronavirus vaccines. According to the report, the nurses and health workers were part of a government program that visits different towns and vaccinates the local population. The rioters said they opposed the vaccination process because one of the local inhabitants wa…	0	5	2	ACLED
2021-10-09	2021	Rioters (Italy)	Europe	Italy	Lazio	Roma		Rome - Nomentano	41.916	12.5187	On 9 October 2021, in the night, a No Vax demonstrator was brought into the Umberto I hospital in Rome - Nomentano (Roma, Lazio) because he got injured during an anti-green pass demonstration. He refused to follow the coronavirus measures and started to violently revolt against the health workers, injuring a nurse with a bottle. Meanwhile, around 30 people broke into the hospital and started to v…	0	5	1	ACLED
2021-10-22	2021	Rioters (Papua New Guinea)	Oceania	Papua New Guinea	Morobe	Lae		West Taraka	-6.6692	146.969	On 22 October 2021, a mob of people attacked nurses and officials carrying out a routine child immunisation program with stones and bottles, causing injuries to two nurses at Banana Block in West Taraka (Morobe). The perpetrators and onlookers had mistakenly believed that the victims were carrying out coronavirus vaccinations under the pretext of the child immunisation program. [size=no report]	0	5	11	ACLED
2021-11-08	2021	Civilians (Papua New Guinea)	Oceania	Papua New Guinea	Southern Highlands	Mendi-Munihu		Mendi	-6.1494	143.649	On 8 November 2021, a group of villagers attacked health workers carrying out coronavirus vaccination awareness raising by chasing them and throwing objects at their two vehicles at Mendi Local Trading supermarket in Mendi (Southern Highlands). [size=no report]	0	5	2	ACLED
2021-11-22	2021	Rioters (Mexico)	North America	Mexico	Guerrero	Acapulco de Juarez		Acapulco de Juarez	16.8619	-99.8866	On 22 November 2021, in Acapulco de Juarez, Guerrero, a group of people prevented nurses, assistants and doctors from leaving facilities for the distribution of coronavirus vaccines in Ciudad Renacimiento. Demonstrators demanded access to vaccines after dosages ran out at the facilities. There were reports of shoving and blows in an attempt to access the coronavirus vaccine dosage. [size=no repor…	0	4	1	ACLED
2021-11-24	2021	Opposition group	TBA	Germany	0	0	0	0	0	0	24 November 2021: In Dresden city, Urban district, Saxony state, unidentified perpetrators threw firecrackers into a vaccination room. No injuries were reported.	0	5	1	Health Care at Risk
2021-12-13	2021	Rioters (Austria)	Europe	Austria	Oberosterreich	Braunau am Inn		Braunau am Inn	48.2528	13.0397	On 13 December 2021, around 300 people demonstrated in Braunau am Inn against coronavirus-related measures. Demonstrators verbally attacked a health worker (noticeable by the clothes she was wearing) on her way to work and poured a thermal mug full of coffee on her face. [size=around 300]	0	11	3	ACLED
2021-12-20	2021	Rioters (Greece)	Europe	Greece	Thessaly-Central Greece	Thessaly	Magnissia	Volos	39.373	22.9427	On 20 December 2021, relatives of a coronavirus patient pushed their way through in Volos hospital to prevent the intubation of their severely ill mother. They confronted doctors and the director of the hospital and caused damages to the building and equipment. They were all arrested. [size=no report]	0	1	1	ACLED
