# Supplementary material for: Collective Violence against Health Workers in the Context of the COVID-19 Pandemic
Source: Nurs Rep. 2023 Jun 14;13(2):902–12. doi: 10.3390/nursrep13020079 (PMC10303091; doi:10.3390/nursrep13020079)
Supplement: Supplementary file 1 [file nursrep-13-00079-s001.zip › nursrep-2393431-S2 - Data used for the analysis.xlsx]

## Sheet: Data
Country	Attacks risk	Total attacks	Population	Physcians/1000	Physician density	Human Development	Democracy	Level of democracy	% fully vaccinated	Total deaths/million
Afghanistan	0.513765	2	38928341	0.2782	low	0.511	-1	low	-999	184.66
Albania	0	0	2837743	1.6471	medium	0.795	9	high	-999	1119.76
Algeria	0	0	43851043	1.7193	medium	0.748	2	medium	-999	140.665
Angola	0.304263	1	32866268	0.2146	low	0.581	-2	low	-999	52.161
Argentina	0.440754	2	45376763	3.9901	medium	0.845	9	high	71.61	2569.17
Armenia	0	0	2963234	4.4023	high	0.776	7	medium	-999	2685.87
Australia	1.1679	3	25687041	3.7595	medium	0.944	10	high	76.61	87.365
Austria	1.12143	1	8917205	5.2114	high	0.922	10	high	69.44	1518.62
Azerbaijan	0	0	10093121	3.446	medium	0.756	-7	low	45.74	817.541
Bahrain	0	0	1701583	0.9257	low	0.852	-10	low	67.38	797.348
Bangladesh	0.0607204	1	164689383	0.6367	low	0.632	-6	low	-999	168.8
Belarus	0	0	9379952	5.1905	high	0.823	-7	low	-999	590.71
Belgium	0	0	11555997	5.9556	high	0.931	8	high	75.82	2435.54
Benin	0	0	12123198	0.0647	very low	0.545	7	medium	-999	12.931
Bhutan	0	0	771612	0.46	low	0.654	7	medium	-999	3.847
Bolivia	5.14005	6	11673029	1.0299	medium	0.718	7	medium	38.82	1663.15
Bosnia and Herzegovina	0	0	3280815	2.1616	medium	0.78	-999	no data	-999	4118.94
Botswana	0	0	2351625	0.2893	low	0.735	8	high	43.13	1019.51
Brazil	0.0470457	1	212559409	2.3106	medium	0.765	8	high	67.03	2894.17
Bulgaria	0	0	6934015	4.2071	high	0.816	9	high	27.77	4488.41
Burkina Faso	0	0	20903278	0.094	very low	0.452	6	medium	-999	14.793
Burundi	0	0	11890781	0.1001	low	0.433	-1	low	-999	3.101
Cabo Verde	0	0	555988	0.7814	low	0.665	10	high	-999	626.445
Cambodia	0	0	16718971	0.1927	low	0.594	-4	low	80.6	177.736
Cameroon	0.753413	2	26545864	0.0881	very low	0.563	-4	low	-999	67.991
Canada	0	0	38005238	2.4425	medium	0.929	10	high	77.27	803.012
Central African Republic	0	0	4829764	0.0721	very low	0.397	6	medium	-999	20.529
Chad	0	0	16425859	0.0542	very low	0.398	-2	low	-999	10.701
Chile	2.09247	4	19116209	5.1824	high	0.851	10	high	86.1	2035.93
China	0.0141751	2	1410929362	1.9798	medium	0.761	-7	low	-999	3.21
Colombia	0.786119	4	50882884	3.8441	medium	0.767	7	medium	55.25	2534.67
Comoros	0	0	869595	0.1699	low	0.554	-3	low	27.7	176.711
Congo	0	0	5518092	0.1064	low	0.574	-4	low	-999	64.875
Costa Rica	0	0	5094114	1.3386	medium	0.81	10	high	-999	1430.81
Cote d'Ivoire	0	0	26378275	2.8939	medium	0.538	4	medium	7.99	26.392
Croatia	0	0	4047200	0.1623	low	0.851	9	high	47.86	3071.79
Cuba	0	0	11326616	8.4199	high	0.783	-5	low	85.46	735.322
Cyprus	0	0	1207361	1.9509	medium	0.887	10	high	-999	712.05
Czech Republic	0	0	10698896	4.1157	high	0.9	9	high	62.09	3368.81
Denmark	0	0	5831404	4.2247	high	0.94	10	high	78.32	561.987
Djibouti	0	0	988002	0.2237	low	0.524	3	medium	-999	188.586
Dominican Republic	0	0	10847904	1.4518	medium	0.756	7	medium	52.03	387.722
DRC	0.22331	2	89561404	0.0899	very low	0.48	-3	low	-999	13.044
Ecuador	0	0	17643060	2.22	medium	0.759	5	medium	70.94	1882.83
Egypt, Arab Rep.	0.0977188	1	102334403	0.7463	low	0.707	-4	low	-999	208.636
El Salvador	0	0	6486201	2.8699	medium	0.673	8	high	-999	586.638
Equatorial Guinea	0	0	1402985	0.4017	low	0.592	-6	low	-999	120.699
Eritrea	0	0	6081000	-999	no data	0.459	-7	low	-999	21.103
Estonia	0	0	1331057	3.4629	medium	0.892	9	high	61.75	1457.91
Eswatini	0	0	1160164	0.0961	very low	0.611	-9	low	-999	1111.42
Ethiopia	0	0	114963583	0.0769	very low	0.485	1	medium	-999	58.85
Fiji	0	0	896444	0.86	low	0.743	2	medium	-999	773.065
Finland	0	0	5530719	4.6404	high	0.938	10	high	-999	308.92
France	0	0	67391582	6.5344	high	0.901	10	high	73.45	1836.27
Gabon	0	0	2225728	0.6819	low	0.703	3	medium	-999	126.381
Gambia, The	0	0	2416664	0.1073	low	0.496	4	medium	-999	137.921
Georgia	2.69251	1	3714000	7.0784	high	0.812	7	medium	-999	3467.53
Germany	0.120134	1	83240525	4.2488	high	0.947	10	high	70.65	1336.24
Ghana	0.321823	1	31072945	0.1064	low	0.611	8	high	-999	40.81
Greece	1.86645	2	10715549	6.2262	high	0.888	10	high	67.89	2004.68
Guatemala	1.18636	2	16858333	0.3549	low	0.663	8	high	25.68	882.582
Guinea	0.761453	1	13132792	0.0832	very low	0.477	4	medium	6.86	28.969
Guinea-Bissau	0	0	1967998	0.1274	low	0.48	6	medium	-999	73.927
Guyana	0	0	786559	1.819	medium	0.682	7	medium	-999	1333.62
Haiti	0.876998	1	11402533	0.2343	low	0.51	5	medium	-999	66.368
Honduras	1.00963	1	9904608	0.3089	low	0.634	7	medium	-999	1036.77
Hungary	0	0	9749763	3.4075	medium	0.854	10	high	-999	4067.4
India	0.920287	127	1380004385	0.9281	low	0.645	9	high	43.29	345.545
Indonesia	0.475279	13	273523621	0.4651	low	0.718	9	high	41.13	521.396
Iran, Islamic Rep.	0.119058	1	83992953	1.5844	medium	0.783	-7	low	-999	1547.78
Iraq	0	0	40222503	0.7079	low	0.674	6	medium	-999	586.653
Ireland	0	0	4994724	3.352	medium	0.955	10	high	77.47	1186.46
Israel	2.16993	2	9216900	5.4667	high	0.919	6	medium	63.85	887.203
Italy	0.33583	2	59554023	8.013	high	0.892	10	high	74.13	2276.09
Jamaica	0	0	2961161	0.4549	low	0.734	9	high	-999	831.69
Japan	0	0	125836021	2.4796	medium	0.919	10	high	-999	145.886
Jordan	0	0	10203140	2.3237	medium	0.729	-3	low	-999	1232.15
Kazakhstan	0	0	18754440	3.98	medium	0.825	-6	low	44.83	958.728
Kenya	0	0	53771300	0.1565	low	0.601	9	high	-999	97.807
Korea, Rep.	0	0	51780579	2.4082	medium	0.916	8	high	83.07	109.638
Kuwait	0	0	4270563	2.6463	medium	0.806	-7	low	-999	570.167
Kyrgyz Republic	1.51708	1	6591600	2.213	medium	0.697	8	high	-999	422.73
Lao PDR	0	0	7275556	0.3726	low	0.613	-7	low	-999	50.411
Latvia	0	0	1901548	3.3015	medium	0.866	8	high	67.62	2447.86
Lebanon	0	0	6825442	2.1038	medium	0.744	6	medium	27.05	1347.14
Lesotho	0	0	2142252	0.0692	very low	0.527	8	high	33.7	308.003
Liberia	0	0	5057677	0.0376	very low	0.48	7	medium	-999	55.403
Libya	0	0	6871287	2.0905	medium	0.724	0	low	-999	820.575
Lithuania	0	0	2794700	5.0399	high	0.882	10	high	68.11	2746.24
Luxembourg	0	0	632275	3.0073	medium	0.916	10	high	-999	1441.37
Madagascar	0	0	27691019	0.1812	low	0.528	6	medium	-999	36.127
Malawi	3.65918	7	19129955	0.0358	very low	0.483	6	medium	3.59	120.32
Malaysia	0.308966	1	32365998	1.5358	medium	0.81	7	medium	78.21	960.667
Mali	0	0	20250834	1.7084	medium	0.434	5	medium	-999	31.646
Mauritania	0	0	4649660	0.1865	low	0.546	-2	low	-999	181.357
Mauritius	0	0	1265740	2.5331	medium	0.804	10	high	-999	617.232
Mexico	2.55947	33	128932753	4.8496	high	0.779	8	high	-999	2298.66
Moldova	0	0	2620495	2.5586	medium	0.75	9	high	24.41	2553.41
Mongolia	0	0	3278292	3.8518	medium	0.737	10	high	64.99	618.452
Montenegro	0	0	621306	2.7557	medium	0.829	9	high	43.44	3838.86
Morocco	0	0	36910558	0.7308	low	0.686	-4	low	-999	397.619
Mozambique	0	0	31255435	0.0846	very low	0.456	5	medium	-999	62.37
Myanmar	1.47032	8	54409794	0.7369	low	0.583	-5	low	-999	351.567
Namibia	3.93559	1	2540916	0.5914	low	0.646	6	medium	-999	1404.14
Nepal	1.37283	4	29136808	0.8091	low	0.602	7	medium	-999	390.7
Netherlands	0.573357	1	17441139	3.7066	medium	0.944	10	high	-999	1222.79
New Zealand	1.96684	1	5084300	3.4205	medium	0.931	10	high	75.22	9.949
Nicaragua	0	0	6624554	1.6645	medium	0.66	6	medium	-999	32.377
Niger	0	0	24206636	0.0433	very low	0.394	5	medium	-999	10.943
Nigeria	0.0970216	2	206139587	0.3806	low	0.539	7	medium	2.12	14.333
North Macedonia	0.226355	5	2072531	2.8736	medium	0.774	9	high	-999	3822.03
Norway	0	0	5379475	4.885	high	0.957	10	high	71.83	238.765
Oman	0	0	5106622	1.9301	medium	0.813	-8	low	-999	787.996
Pakistan	0	0	220892331	1.1179	medium	0.557	7	medium	-999	128.477
Panama	0	0	4314768	1.6324	medium	0.815	9	high	56.33	1695.28
Papua New Guinea	3.35307	3	8947027	0.0661	very low	0.555	5	medium	-999	64.7
Paraguay	1.40203	1	7132530	1.3544	medium	0.728	9	high	-999	2302.61
Peru	0.909867	3	32971846	0.82	low	0.777	9	high	64.88	6075.95
Philippines	0.365027	4	109581085	0.6004	low	0.718	8	high	-999	463.804
Poland	0.263499	1	37950802	2.3788	medium	0.88	10	high	55.68	2567.77
Portugal	0	0	10305564	5.3117	high	0.864	10	high	89.53	1864.2
Qatar	0	0	2881060	2.4852	medium	0.848	-10	low	-999	210.884
Romania	0	0	19286123	2.9807	medium	0.828	9	high	40.87	3071.55
Russia	0	0	144104080	4.4395	high	0.824	4	medium	45.76	2074.34
Rwanda	0	0	12952209	0.1182	low	0.543	-3	low	-999	101.683
Saudi Arabia	0	0	34813867	2.6117	medium	0.854	-10	low	65.59	251.184
Senegal	1.19446	2	16743930	0.0881	very low	0.512	7	medium	-999	109.907
Serbia	0	0	6908224	3.1131	medium	0.806	8	high	-999	1850.24
Sierra Leone	2.50721	2	7976985	0.074	very low	0.452	7	medium	-999	15.108
Singapore	0	0	5685807	2.2936	medium	0.938	-2	low	85.43	151.826
Slovak Republic	0	0	5458827	3.517	medium	0.86	10	high	-999	3052.7
Slovenia	0	0	2100126	3.1721	medium	0.917	10	high	57.21	2688.67
Solomon Islands	29.1173	2	686878	0.1937	low	0.567	8	high	-999	0
Somalia	0.629199	1	15893219	0.023	very low	-999	5	medium	-999	81.482
South Africa	0.168609	1	59308690	0.7923	low	0.709	9	high	-999	1518.02
South Sudan	0	0	11193729	-999	no data	0.433	0	low	-999	11.861
Spain	0	0	47351567	4.0299	high	0.904	10	high	-999	1912.6
Sri Lanka	0.456225	1	21919000	1.1539	medium	0.782	6	medium	64.39	696.785
Sudan	0.912216	4	43849269	0.2618	low	0.51	-4	low	-999	74.172
Suriname	0	0	586634	0.8194	low	0.738	5	medium	-999	2009.13
Sweden	0	0	10353442	4.331	high	0.945	10	high	-999	1506.87
Switzerland	0	0	8636896	4.3328	high	0.955	10	high	66.94	1401.76
Syria	0.571407	1	17500657	1.2874	medium	0.567	-9	low	-999	158.516
Tajikistan	0	0	9537642	1.7229	medium	0.668	-3	low	-999	12.821
Tanzania	0	0	59734213	0.0603	very low	0.529	3	medium	-999	11.984
Thailand	0	0	69799978	0.9188	low	0.777	-3	low	66.22	310.189
Timor-Leste	0	0	1318442	0.7687	low	0.606	8	high	-999	90.782
Togo	0	0	8278737	0.0776	very low	0.515	-2	low	12.04	29.251
Trinidad and Tobago	0	0	1399491	4.476	high	0.796	10	high	47.65	2044.36
Tunisia	6.76898	8	11818618	1.2834	medium	0.74	7	medium	49.62	2142.22
Turkey	0	0	84339067	1.8065	medium	0.82	-4	low	60.68	968.466
Turkmenistan	0	0	6031187	2.2247	medium	0.715	-8	low	-999	-999
Uganda	0	0	45741000	0.168	low	0.544	-1	low	-999	69.901
Ukraine	0	0	44134693	2.9923	medium	0.779	4	medium	31.65	2348.64
United Arab Emirates	0	0	9890400	2.5278	medium	0.89	-8	low	-999	216.593
United Kingdom	0.446327	3	67215293	5.8233	high	0.932	8	high	69.54	2180.67
United States	0	0	329484123	2.6036	medium	0.926	7	medium	62.5	2486.8
Uruguay	0	0	3473727	4.9398	high	0.817	10	high	76.79	1770.37
Uzbekistan	0	0	34232050	2.3742	medium	0.72	-9	low	-999	43.759
Venezuela, RB	0.351668	1	28435943	1.73	medium	0.711	-3	low	-999	185.613
Vietnam	0	0	97338583	0.8281	low	0.704	-7	low	-999	329.983
Yemen, Rep.	0.335278	1	29825968	0.5251	low	0.47	0	low	-999	65.069
Zambia	0.543953	1	18383956	0.0925	very low	0.584	6	medium	6.43	197.35
Zimbabwe	0	0	14862927	0.2096	low	0.571	4	medium	20.77	331.563
