# Supplementary material for: Collective Violence against Health Workers in the Context of the COVID-19 Pandemic
Source: Nurs Rep. 2023 Jun 14;13(2):902–12. doi: 10.3390/nursrep13020079 (PMC10303091; doi:10.3390/nursrep13020079)
Supplement: Supplementary file 1 [file nursrep-13-00079-s001.zip › nursrep-2393431-S3 - Correlation coefficients.pdf]

### S3: Correlation coefficients

Correlations between attack risk and socio-economic characteristics at the country level:.

| V1                 | V2               | N   | Coefficient size (R) | P-Value |
|--------------------|------------------|-----|----------------------|---------|
| Attacks/Population | Physicians/1000  | 162 | -0.0728              | 0.3559  |
| Attacks/Population | HDI              | 163 | -0.0875              | 0.2750  |
| Attacks/Population | polity2          | 163 | 0.1096               | 0.1622  |
| Attacks/Population | vaccination rate | 69  | -0.1105              | 0.3682  |

As multivariate regression models have a high risk of model overfit when correlating socio-economic with conflict data [37] for relatively small numbers of cases (here:  $n = 164$ ), we calculated bivariate Pearson's correlation coefficients.
